# Supplementary material for: Diastereoselective tandem reactions of substituted 3-sulfolenes with bis-vinyl ketones leading to highly functionalized bicyclic and tricyclic frameworks
Source: Royal Society of Chemistry journal article supplement (doi:10.1039/c5ob00387c), 2015-01-01

**Tandem Reactions of Substituted 3-Sulfolenes with Bis-Vinyl Ketones Leading to Highly  
Functionalized Bicyclic and Tricyclic Frameworks**

Michael G. Brant, Jordan N. Friedmann, Connor G. Bohlken, Allen G. Oliver and Jeremy E. Wulff

Department of Chemistry, University of Victoria,  
Victoria, British Columbia, Canada V8W 3V6

*Organic and Biomolecular Chemistry*

**Supporting Information**

**Index**

|                                                                              |     |
|------------------------------------------------------------------------------|-----|
| <sup>1</sup> H and <sup>13</sup> C NMR Spectra for Compound <b>3c</b> .....  | S2  |
| <sup>1</sup> H and <sup>13</sup> C NMR Spectra for Compound <b>4b</b> .....  | S3  |
| <sup>1</sup> H and <sup>13</sup> C NMR Spectra for Compound <b>4c</b> .....  | S4  |
| <sup>1</sup> H and <sup>13</sup> C NMR Spectra for Compound <b>4d</b> .....  | S5  |
| <sup>1</sup> H and <sup>13</sup> C NMR Spectra for Compound <b>4d'</b> ..... | S6  |
| <sup>1</sup> H and <sup>13</sup> C NMR Spectra for Compound <b>4e'</b> ..... | S7  |
| <sup>1</sup> H and <sup>13</sup> C NMR Spectra for Compound <b>6b</b> .....  | S8  |
| <sup>1</sup> H and <sup>13</sup> C NMR Spectra for Compound <b>6d</b> .....  | S9  |
| <sup>1</sup> H and <sup>13</sup> C NMR Spectra for Compound <b>6e'</b> ..... | S10 |
| <sup>1</sup> H and <sup>13</sup> C NMR Spectra for Compound <b>7e</b> .....  | S11 |
| <sup>1</sup> H and <sup>13</sup> C NMR Spectra for Compound <b>7f</b> .....  | S12 |
| <sup>1</sup> H and <sup>13</sup> C NMR Spectra for Compound <b>7g</b> .....  | S13 |
| <sup>1</sup> H and <sup>13</sup> C NMR Spectra for Compound <b>9</b> .....   | S14 |
| <sup>1</sup> H and <sup>13</sup> C NMR Spectra for Compound <b>10</b> .....  | S15 |
| <sup>1</sup> H and <sup>13</sup> C NMR Spectra for Compound <b>12a</b> ..... | S16 |
| <sup>1</sup> H and <sup>13</sup> C NMR Spectra for Compound <b>12b</b> ..... | S17 |
| Collected X-Ray Data .....                                                   | S18 |
| Expanded X-Ray Structures for <b>4a-1</b> .....                              | S19 |
| Expanded X-Ray Structures for <b>4c</b> .....                                | S20 |
| Expanded X-Ray Structures for <b>4e' and 6b</b> .....                        | S21 |
| Expanded X-Ray Structures for <b>7f and 12b</b> .....                        | S22 |

**<sup>1</sup>H NMR spectrum for 3c in CDCl<sub>3</sub>**

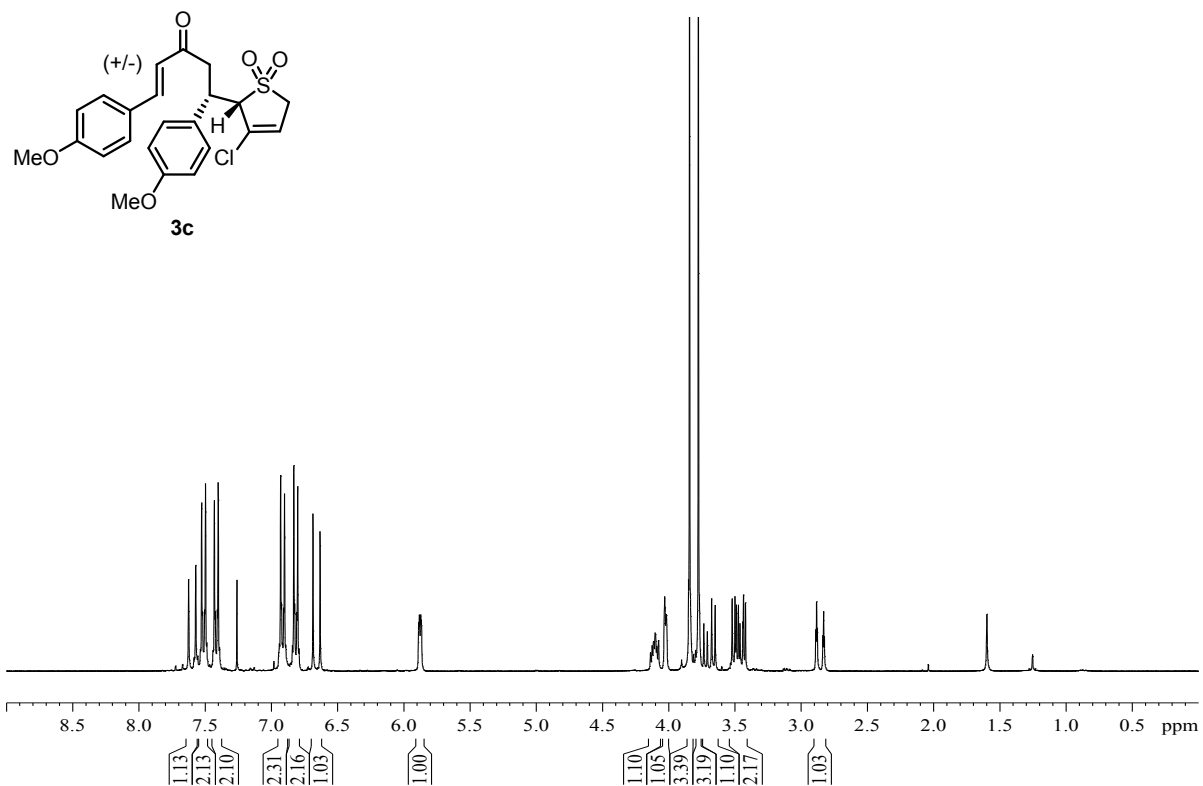

**<sup>13</sup>C NMR spectrum for 3c in CDCl<sub>3</sub>**

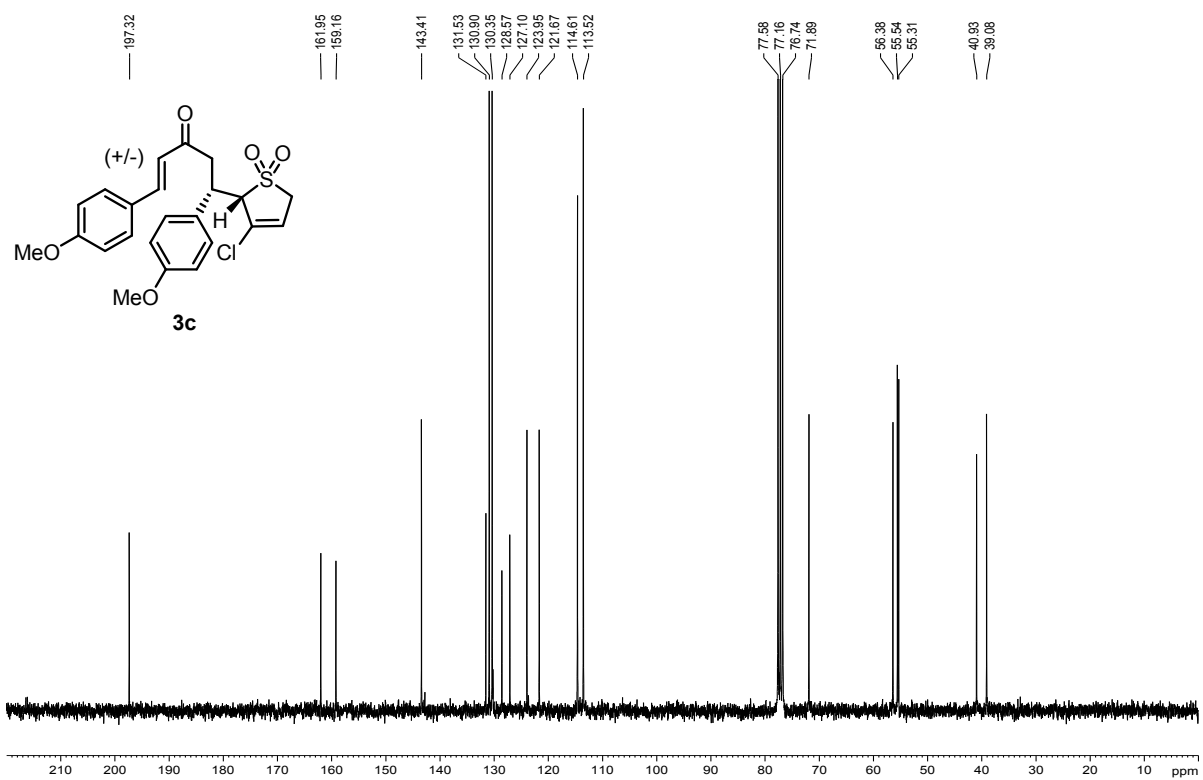

**<sup>1</sup>H NMR spectrum for 4b in CDCl<sub>3</sub>**

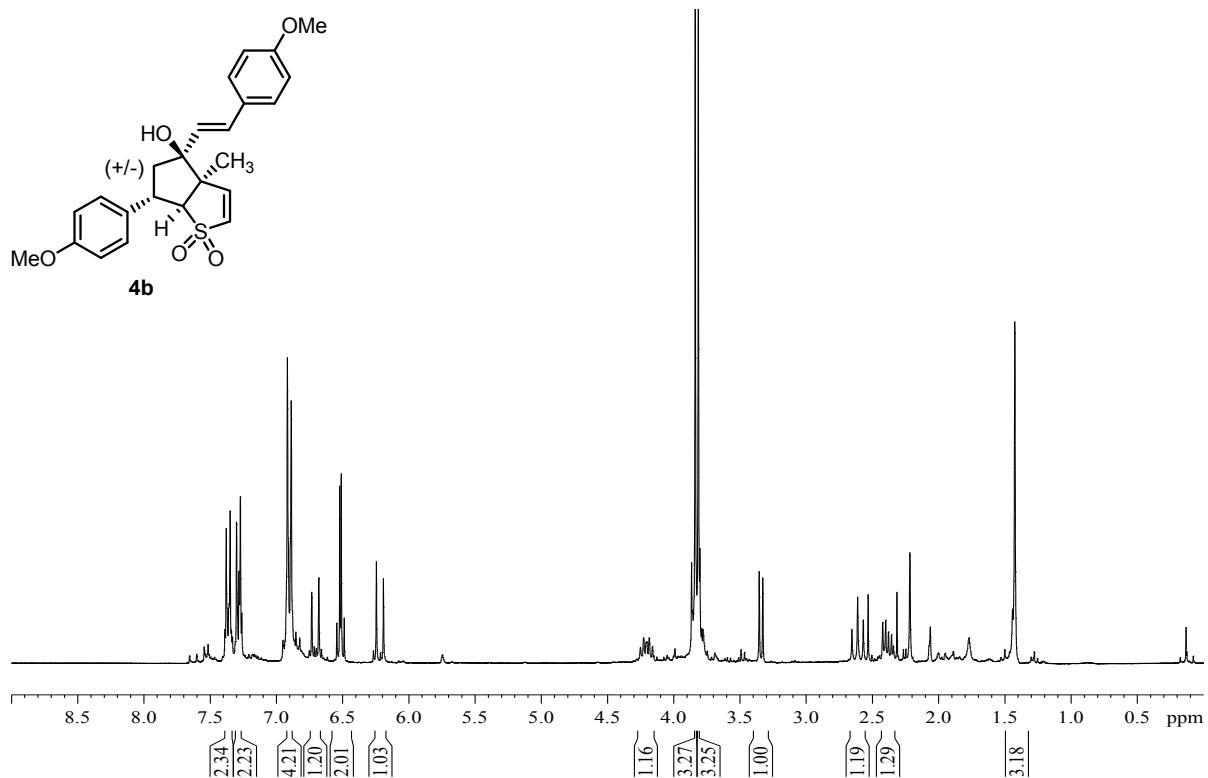

**<sup>13</sup>C NMR spectrum for 4b in CDCl<sub>3</sub>**

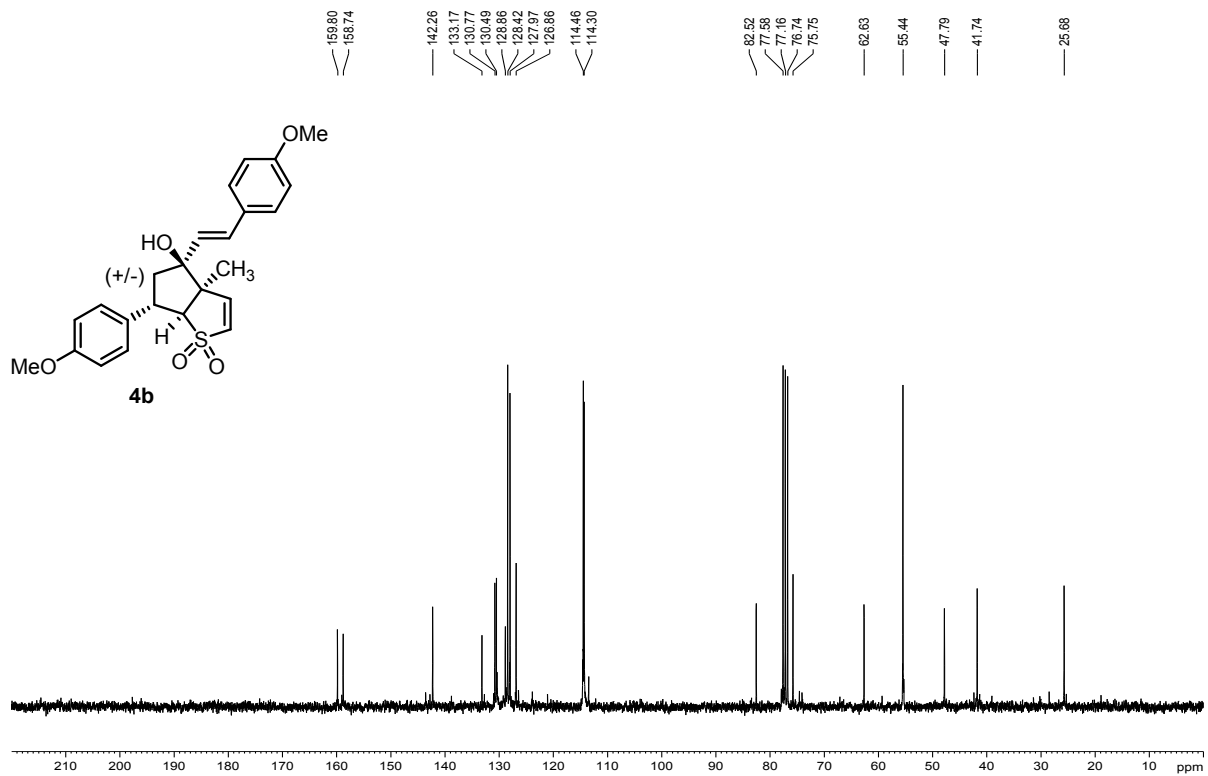

**<sup>1</sup>H NMR spectrum for 4c in CDCl<sub>3</sub>**

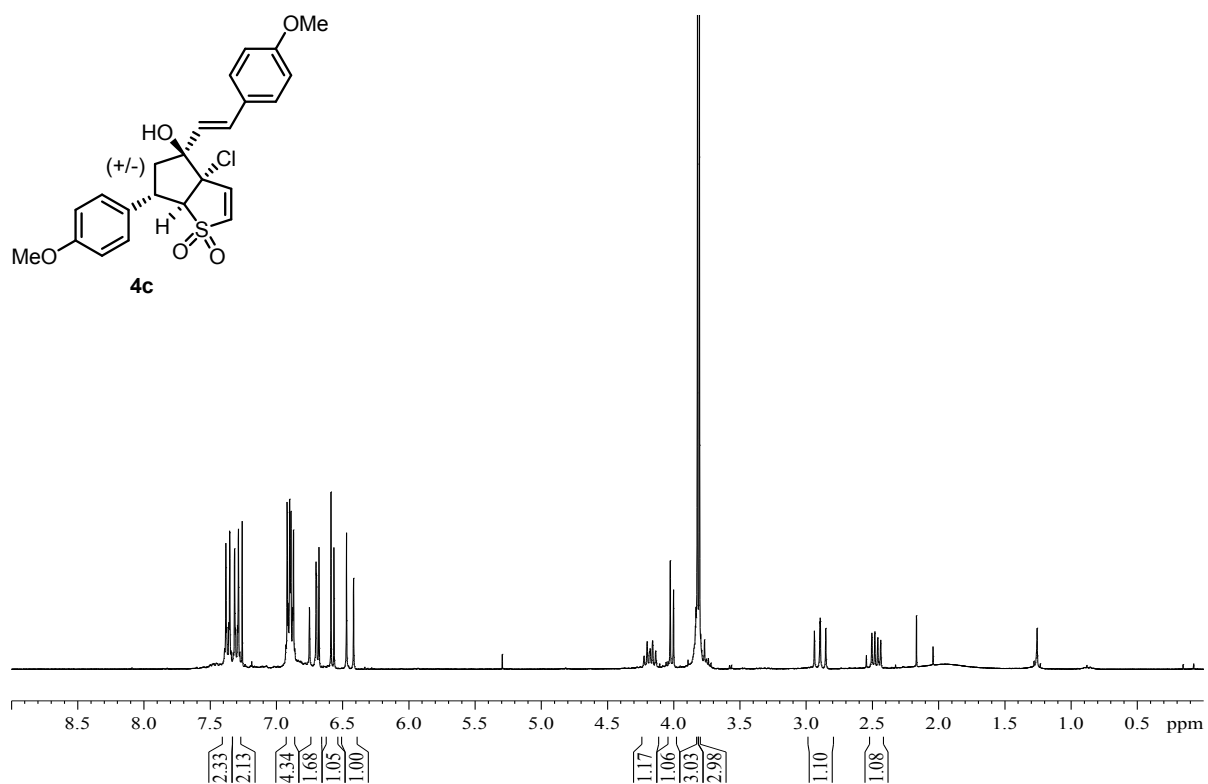

**<sup>13</sup>C NMR spectrum for 4c in CDCl<sub>3</sub>**

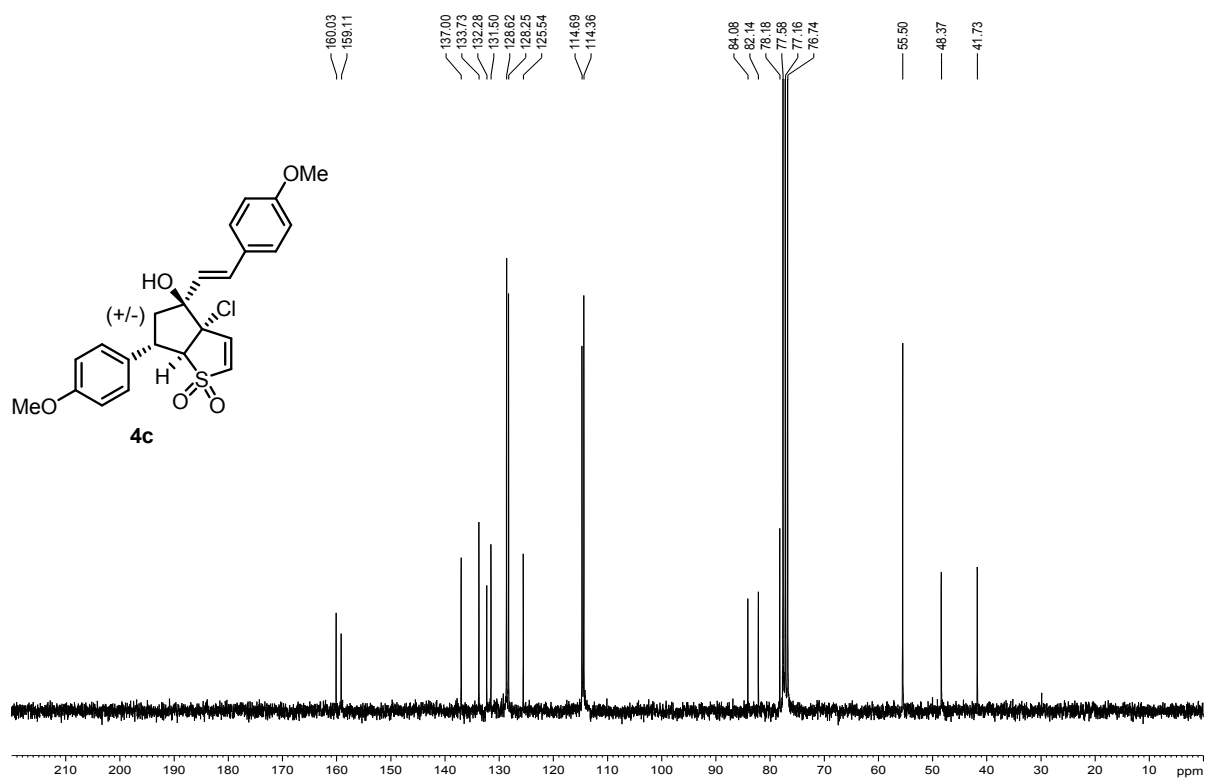

<sup>1</sup>H NMR spectrum for 4d in CDCl<sub>3</sub>

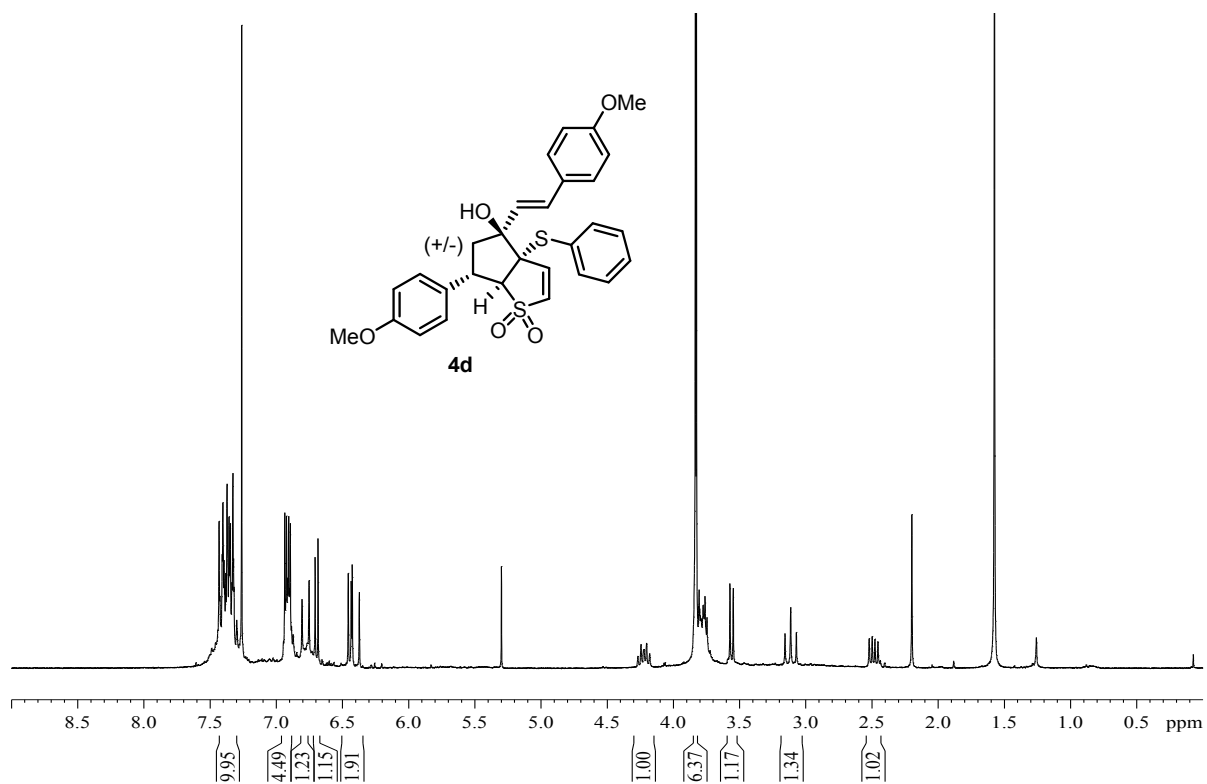

<sup>13</sup>C NMR spectrum for 4d in CDCl<sub>3</sub>

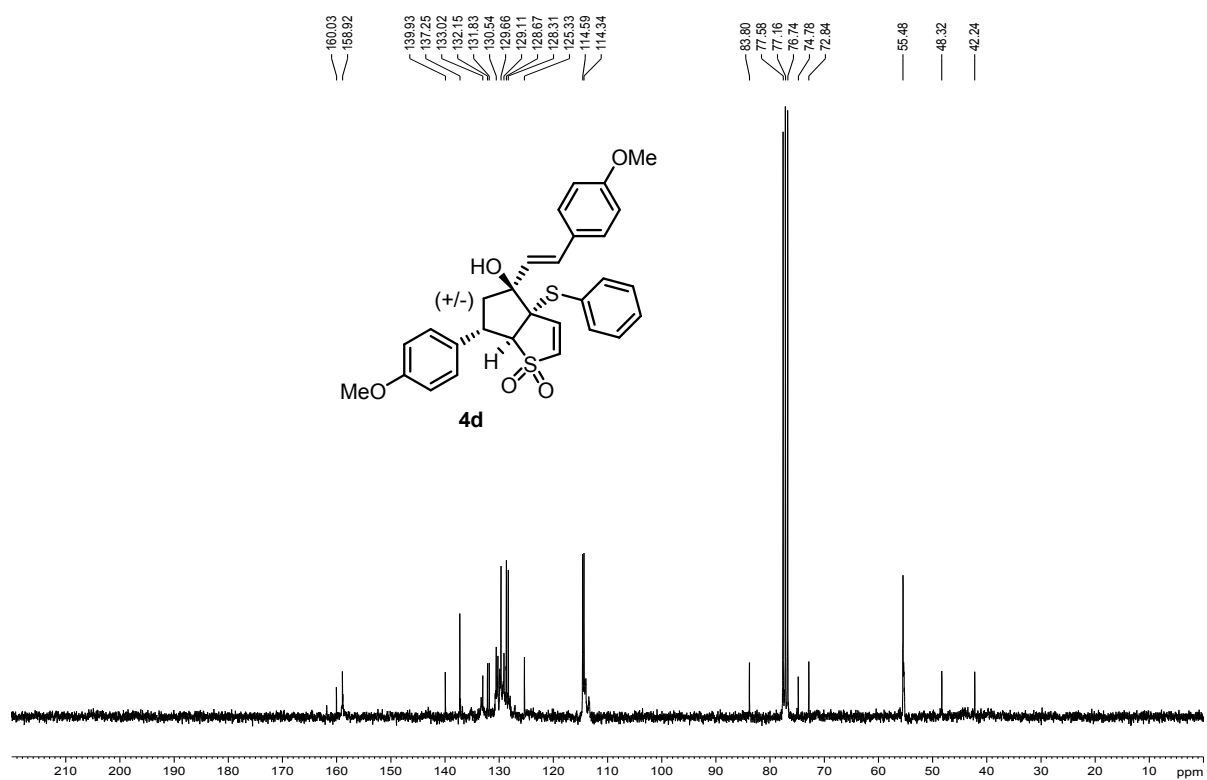

**<sup>1</sup>H NMR spectrum for 4d' (+ minor impurities) in CDCl<sub>3</sub>**

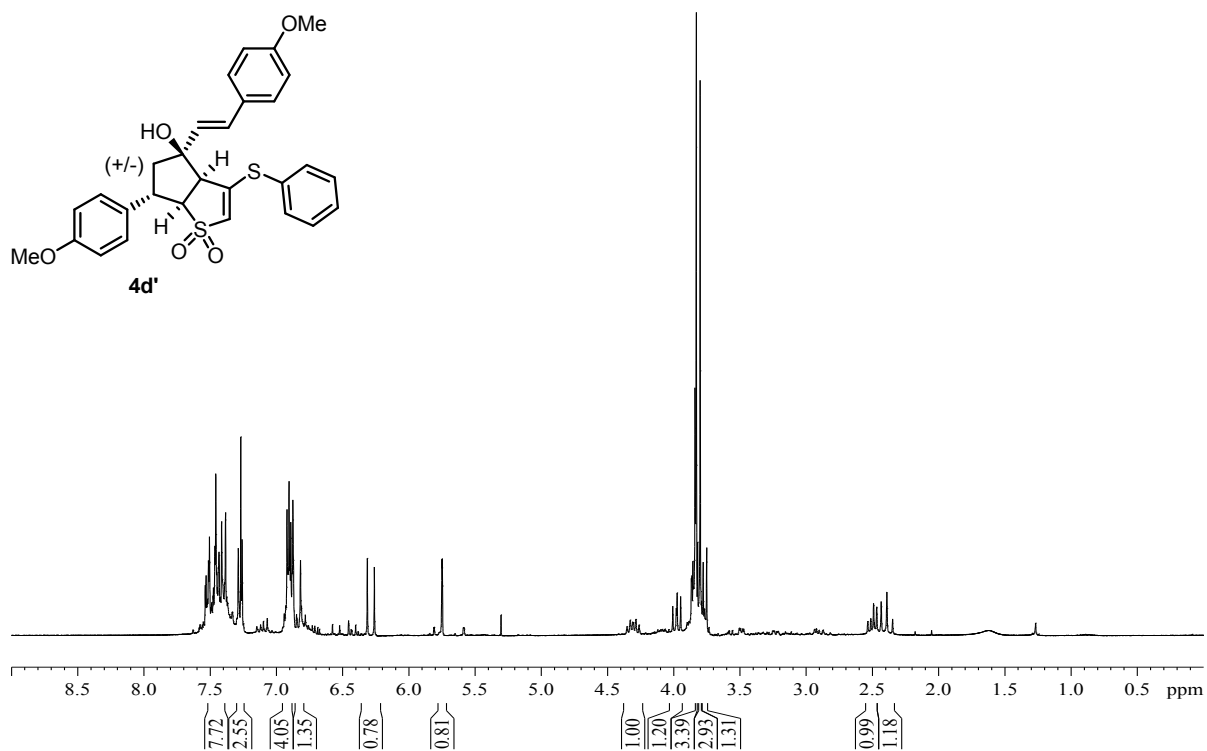

**<sup>13</sup>C NMR spectrum for 4d' (+ minor impurities) in CDCl<sub>3</sub>**

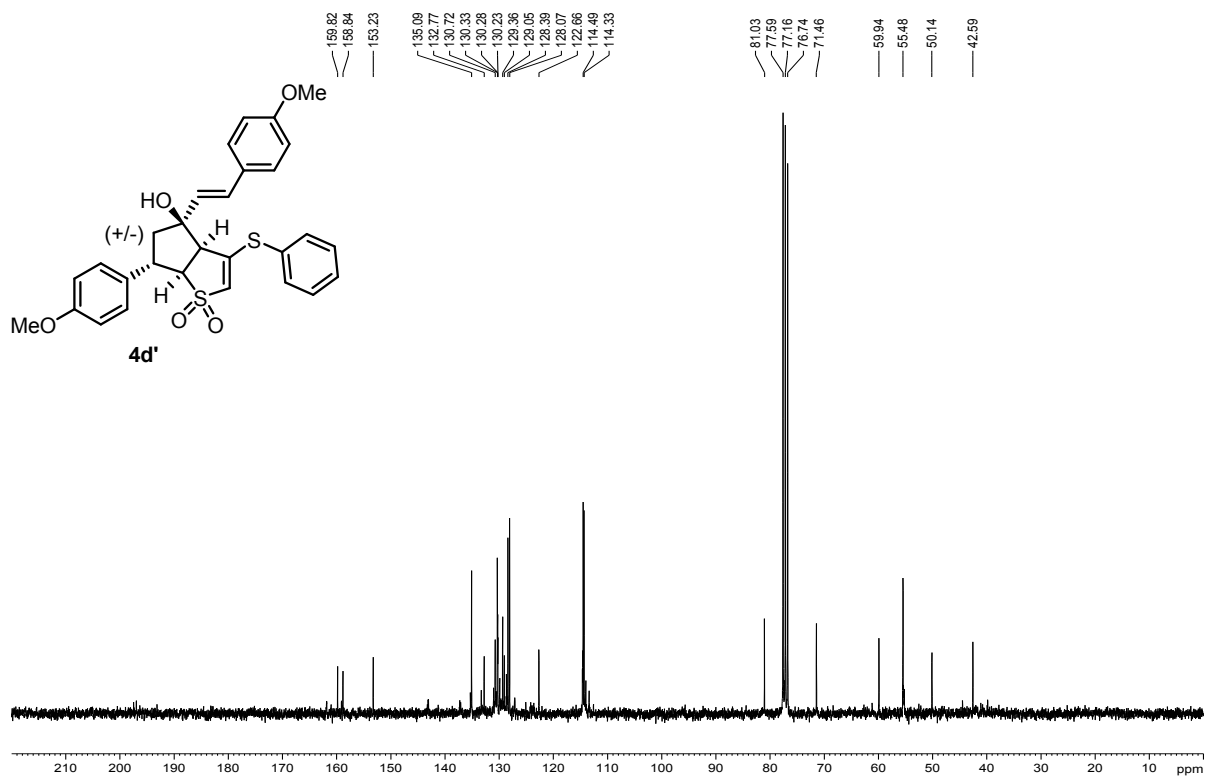



**<sup>1</sup>H NMR spectrum for 4e' in CDCl<sub>3</sub>**

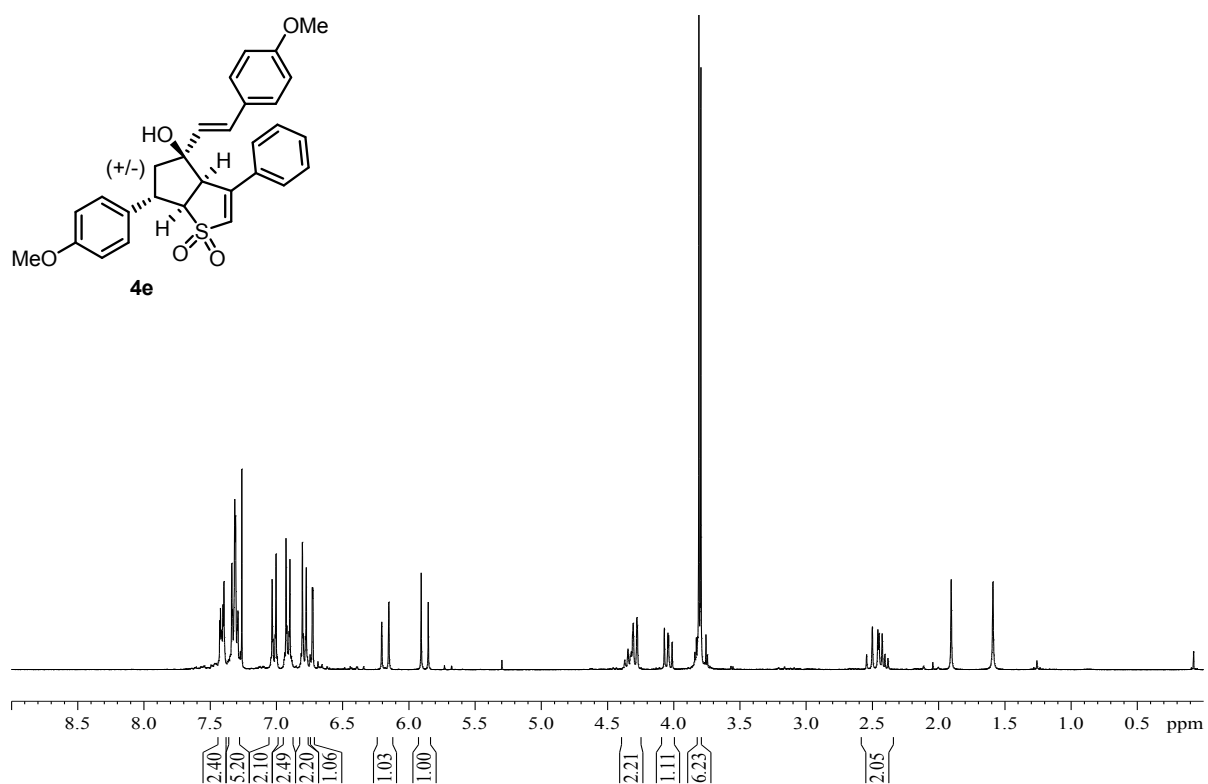

**<sup>13</sup>C NMR spectrum for 4e' in CDCl<sub>3</sub>**

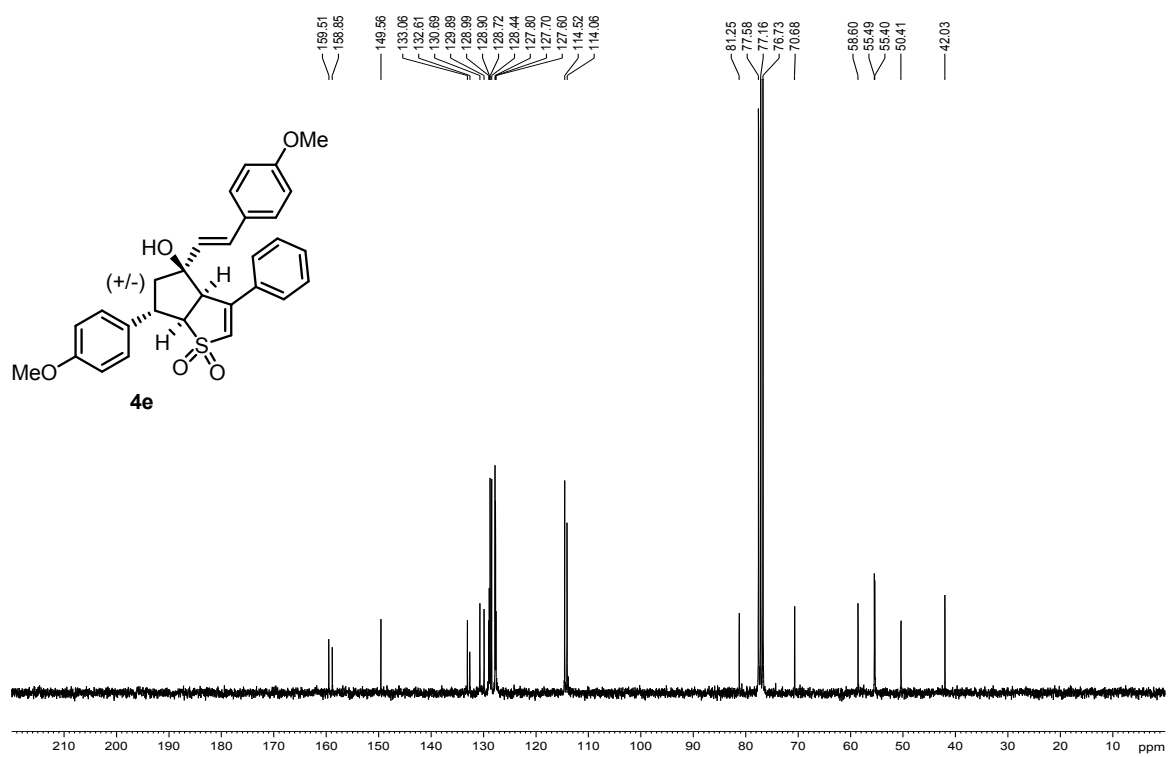



**<sup>1</sup>H NMR spectrum for 6b in CDCl<sub>3</sub>**

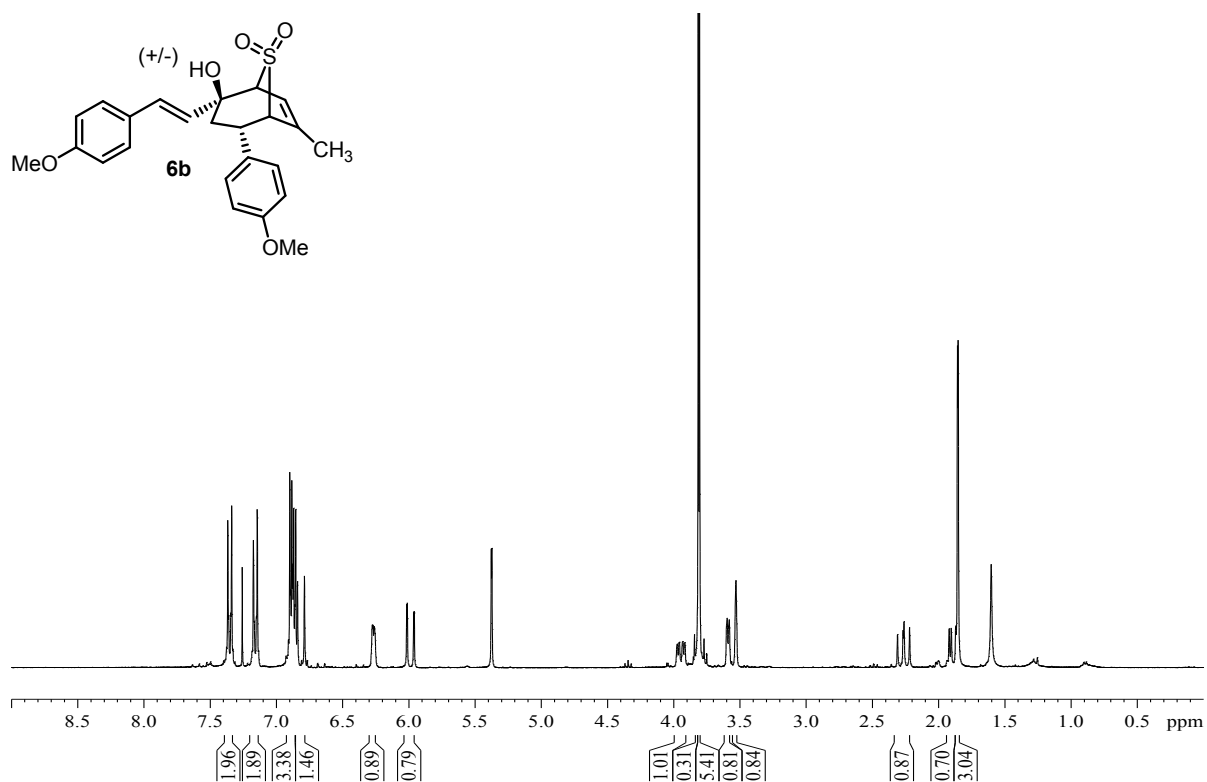

**<sup>13</sup>C NMR spectrum for 6b in CDCl<sub>3</sub>**

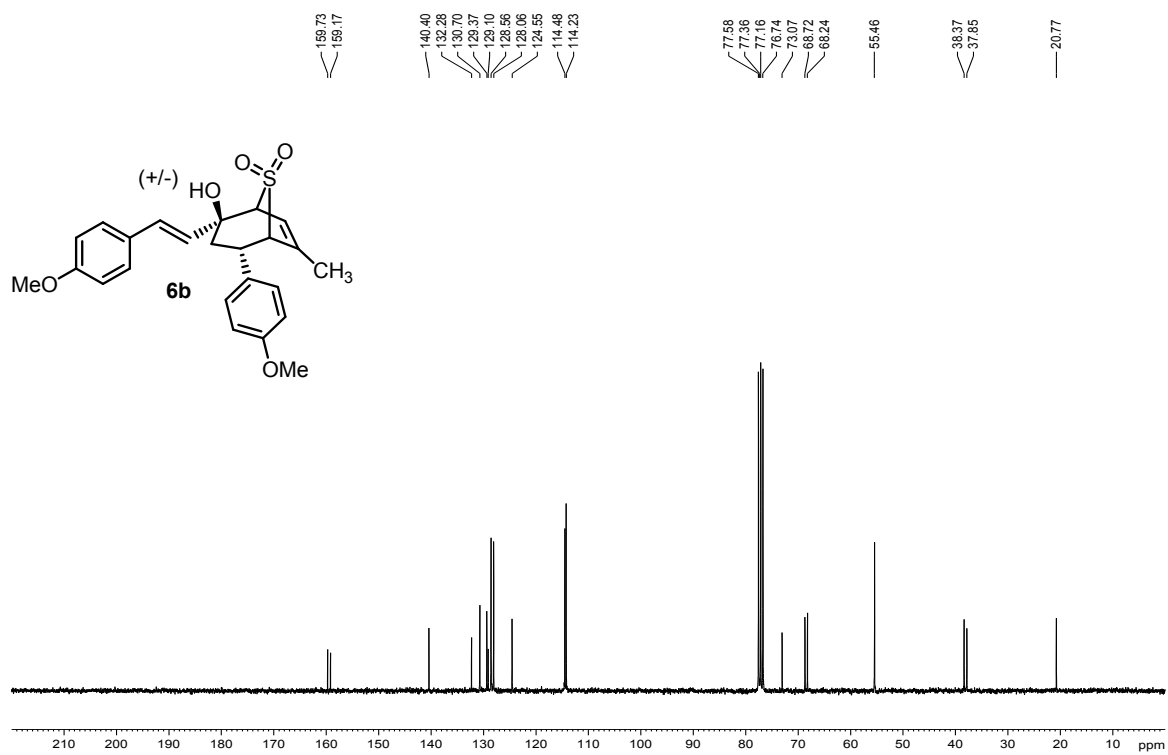

<sup>1</sup>H NMR spectrum for 6d in CDCl<sub>3</sub>

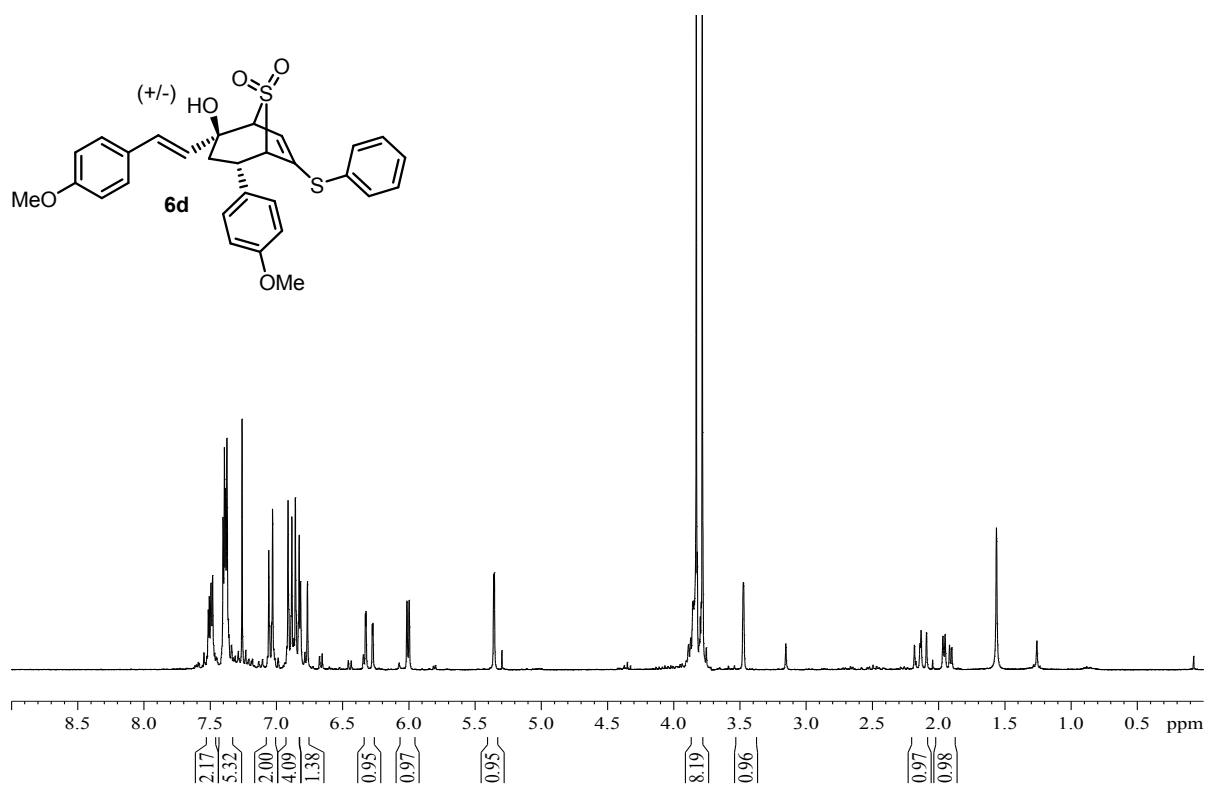

<sup>13</sup>C NMR spectrum for 6d in CDCl<sub>3</sub>

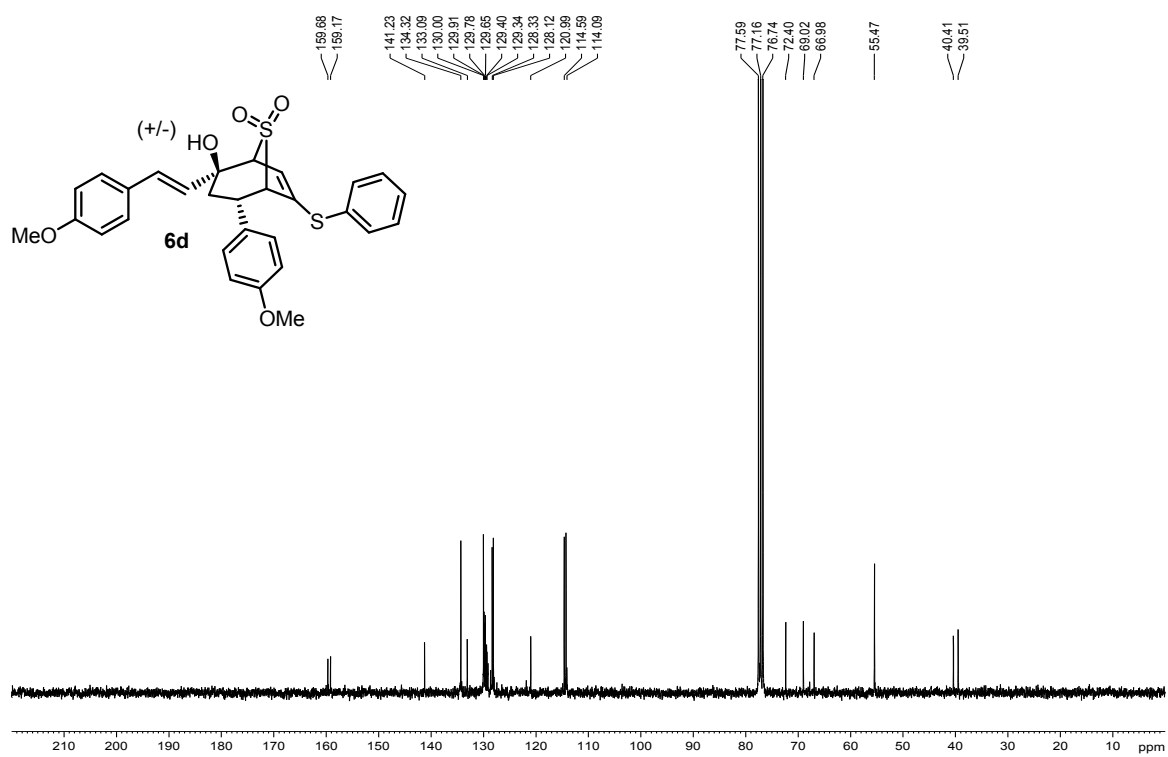

**<sup>1</sup>H NMR spectrum for 6e' in CDCl<sub>3</sub>**

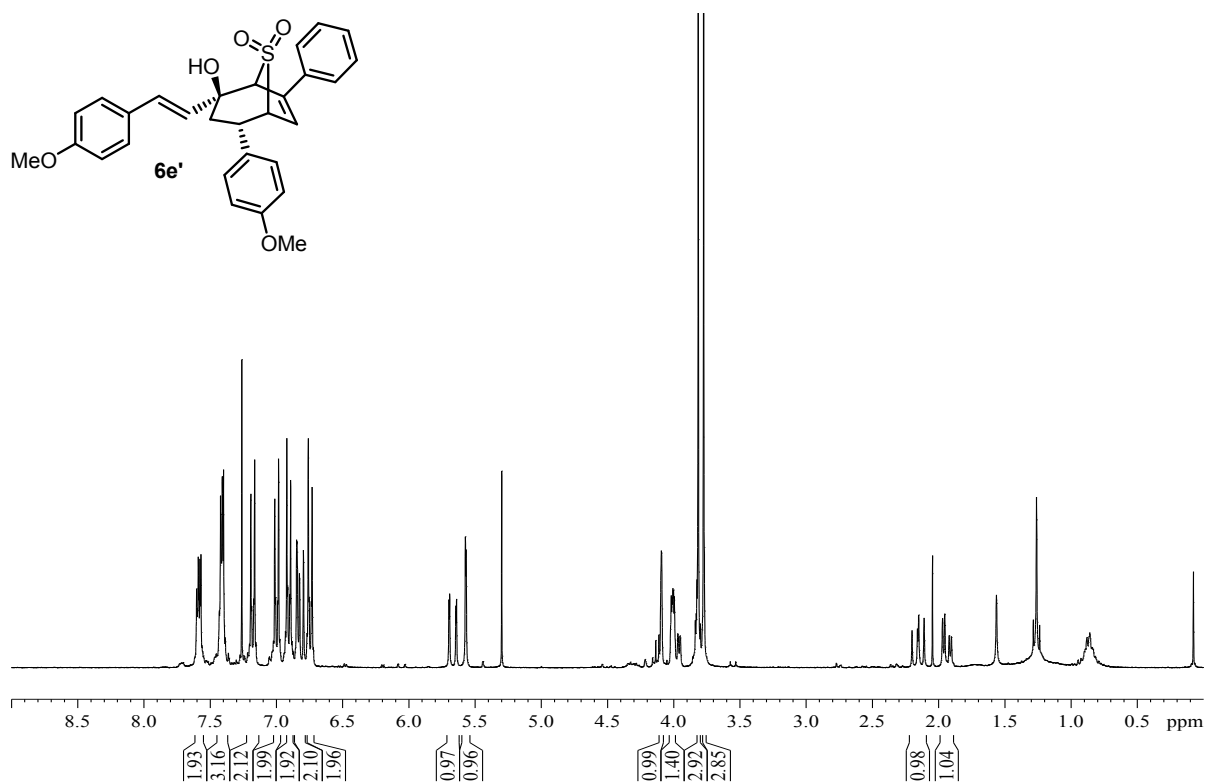

**<sup>13</sup>C NMR spectrum for 6e' in CDCl<sub>3</sub>**

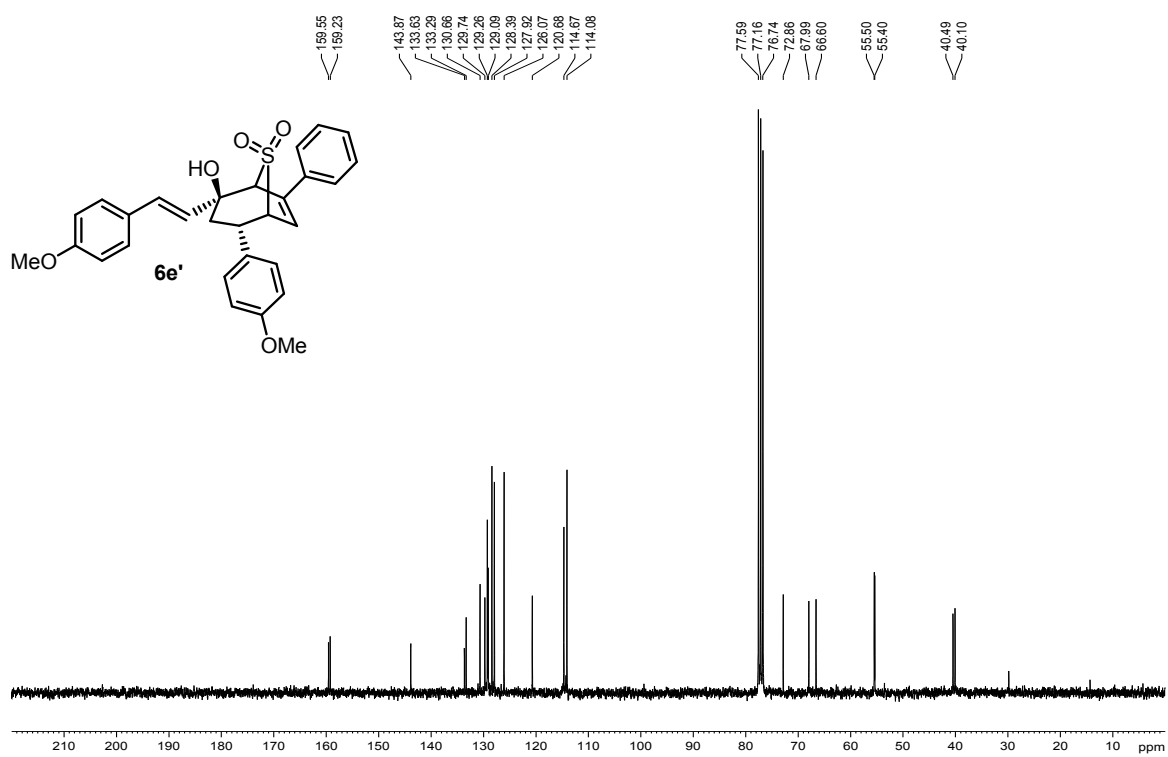

**<sup>1</sup>H NMR spectrum for 7e (with ethyl acetate contaminant) in CDCl<sub>3</sub>**

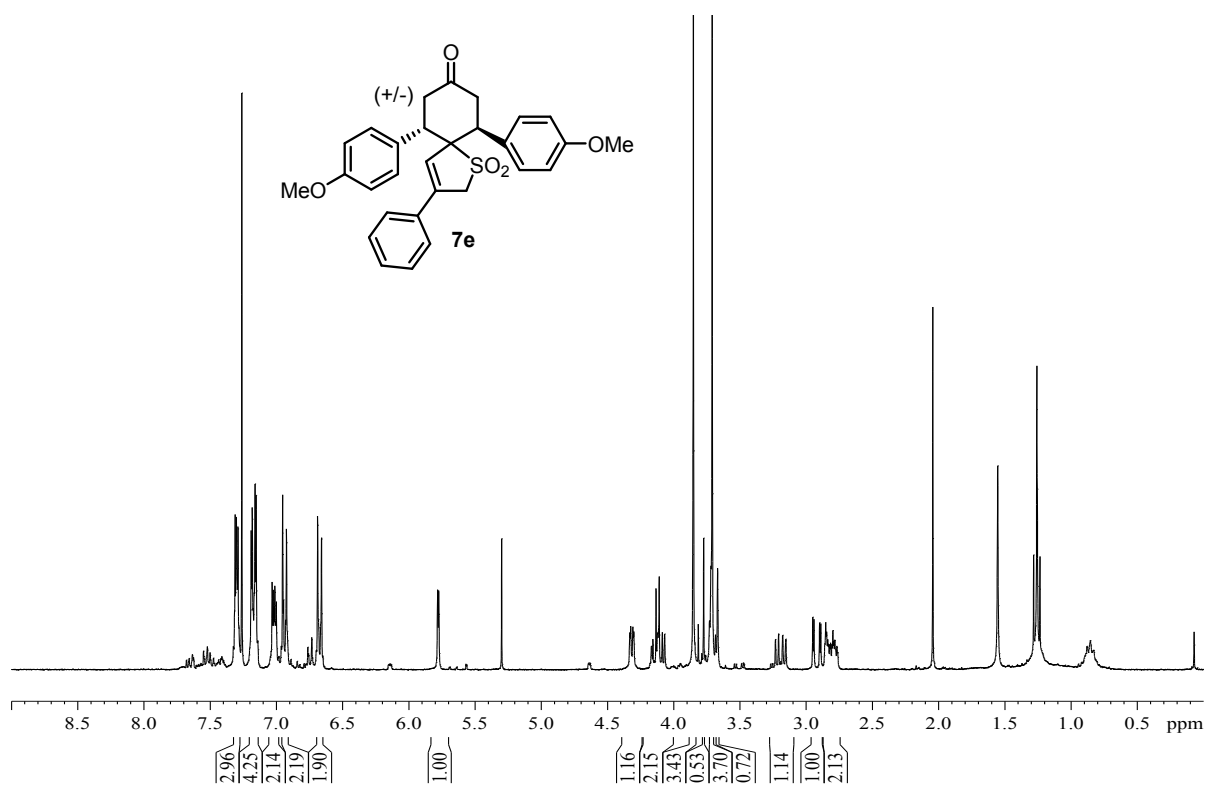

**<sup>13</sup>C NMR spectrum for 7e (with ethyl acetate contaminant) in CDCl<sub>3</sub>**

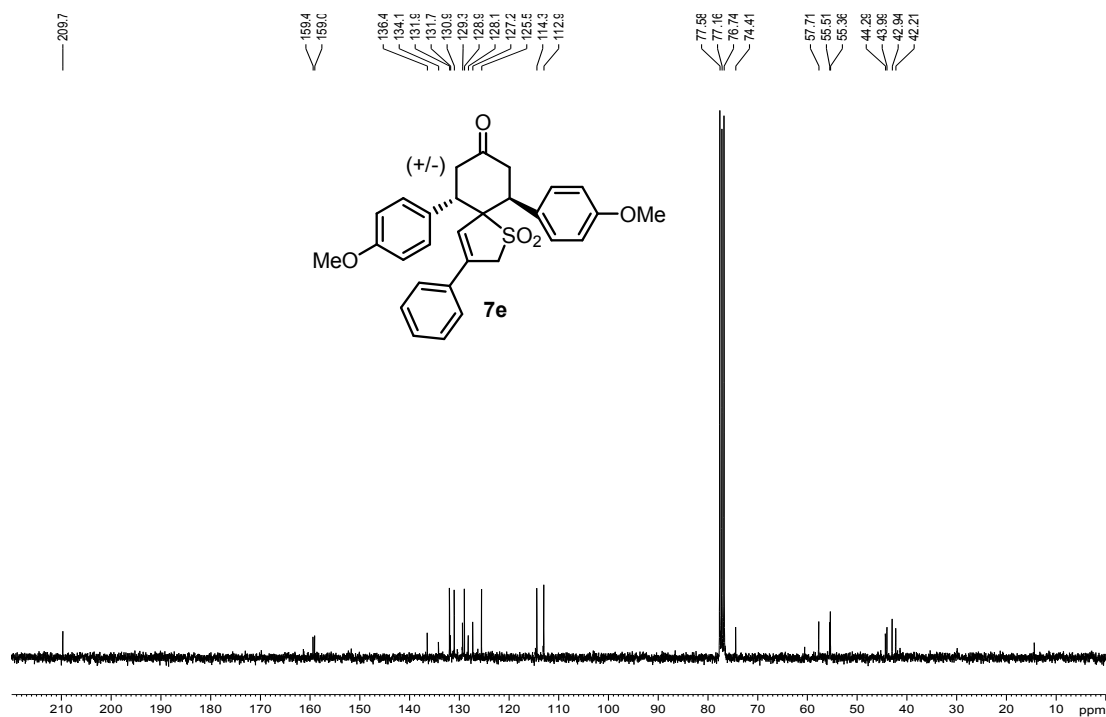

**<sup>1</sup>H NMR spectrum for 7f in CDCl<sub>3</sub>**

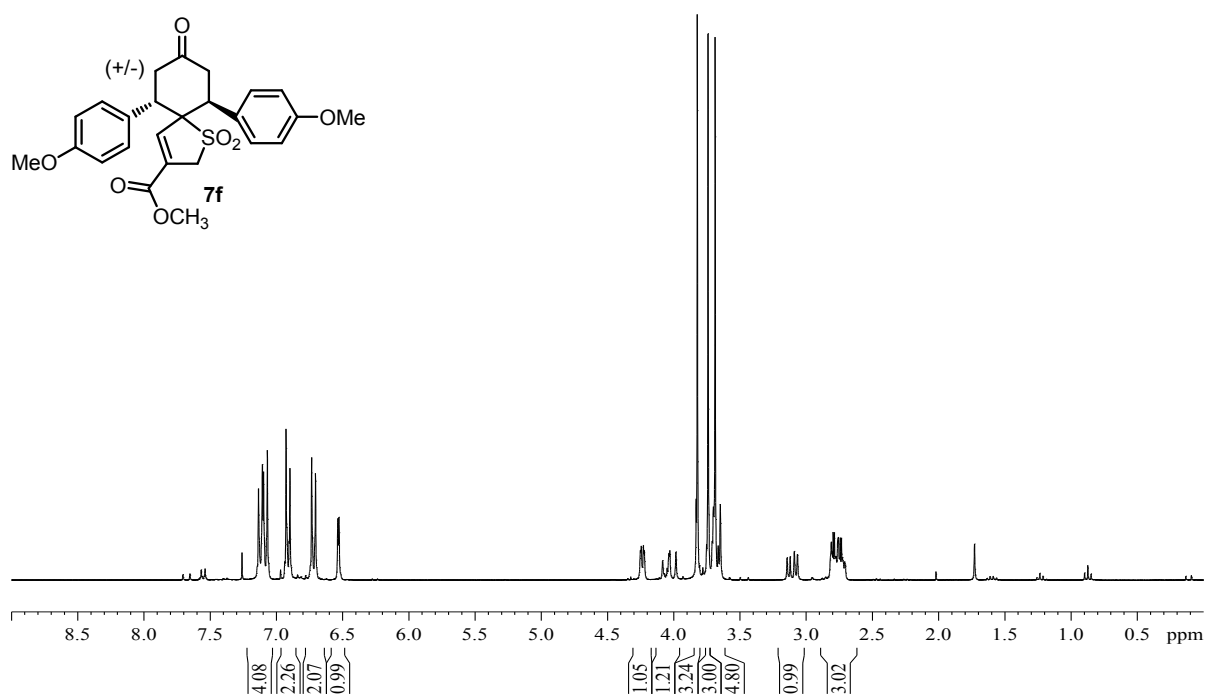

**<sup>13</sup>C NMR spectrum for 7f in CDCl<sub>3</sub>**

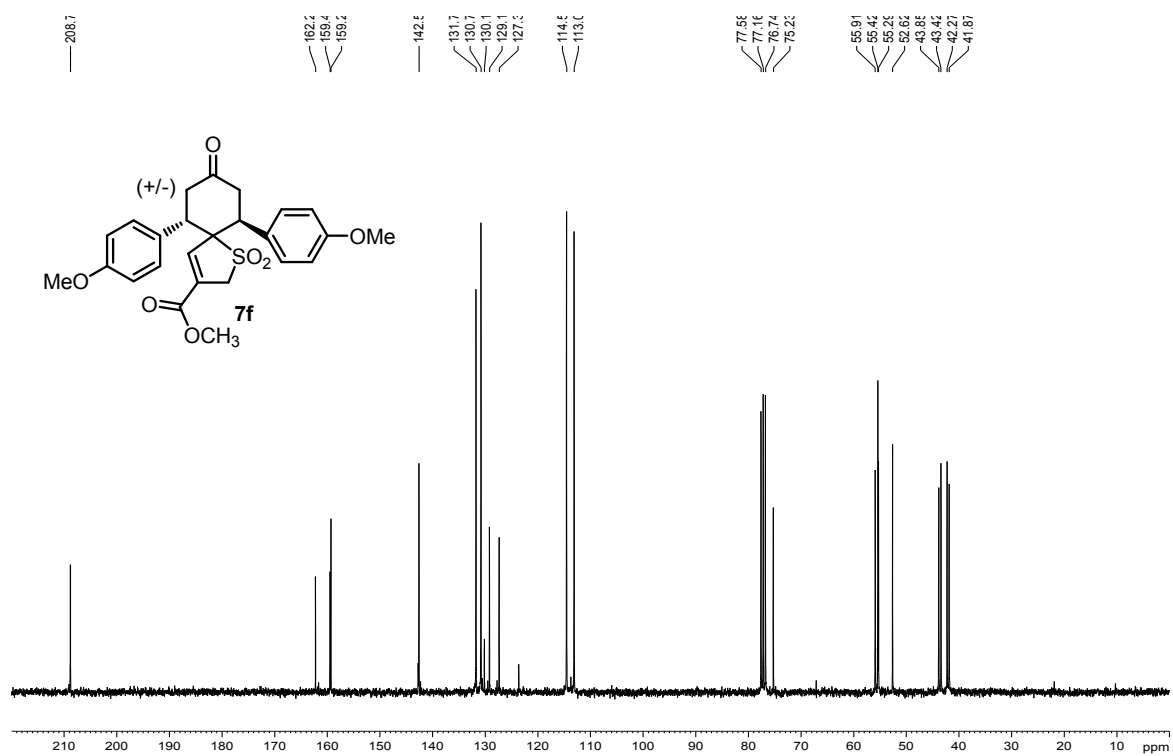

<sup>1</sup>H NMR spectrum for 7g (2:1 ratio 7g:1g) in CDCl<sub>3</sub>

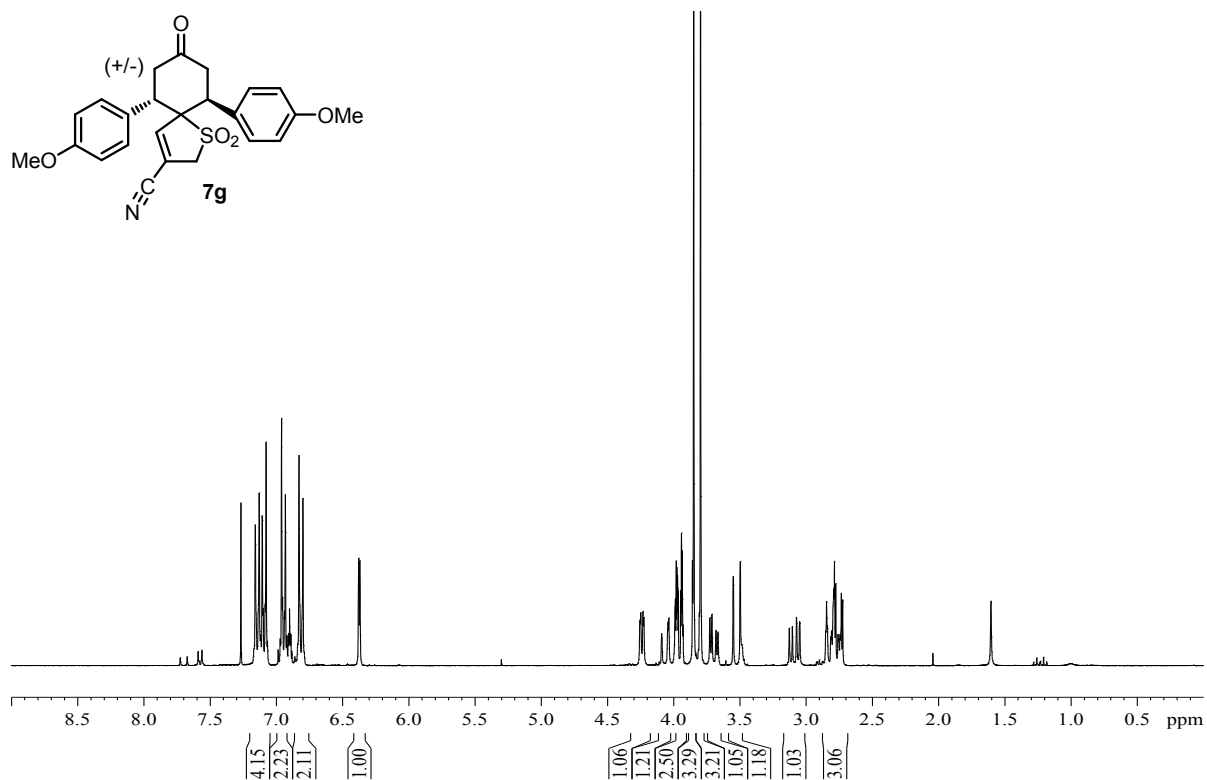

<sup>13</sup>C NMR spectrum for 7g (2:1 ratio 7g:1g) in CDCl<sub>3</sub>

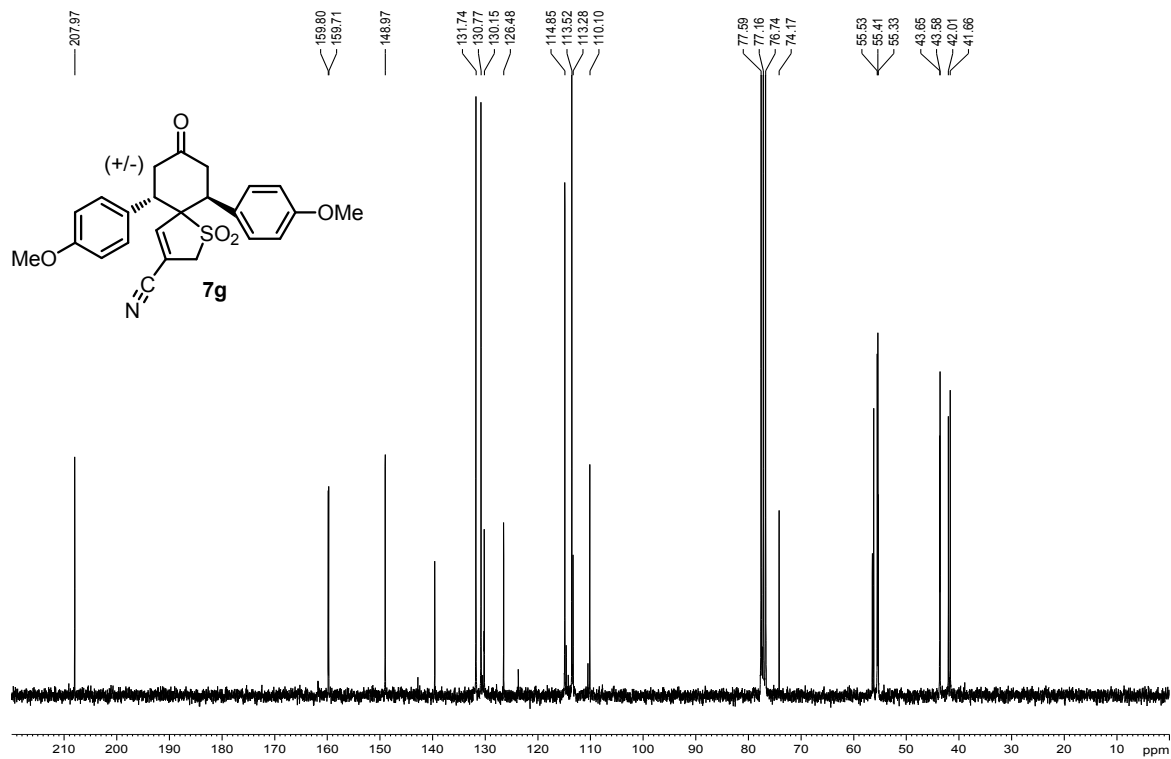

**<sup>1</sup>H NMR spectrum for 9 in CDCl<sub>3</sub>**

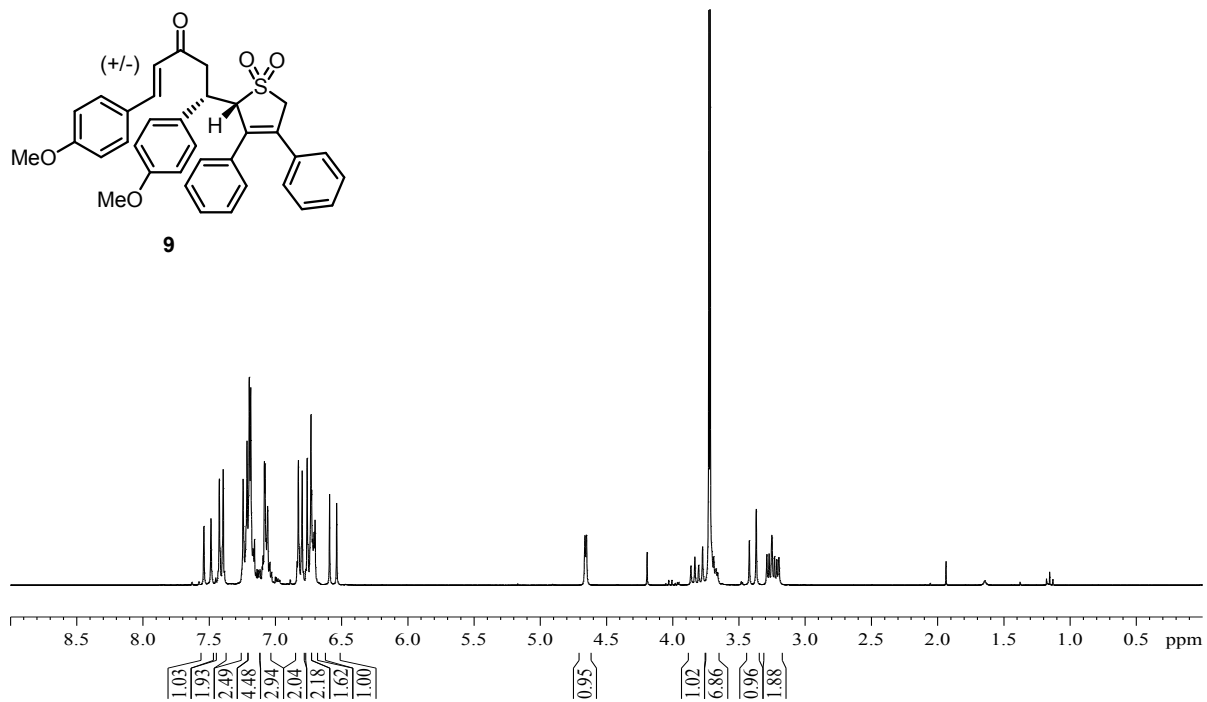

**<sup>13</sup>C NMR spectrum for 9 in CDCl<sub>3</sub>**

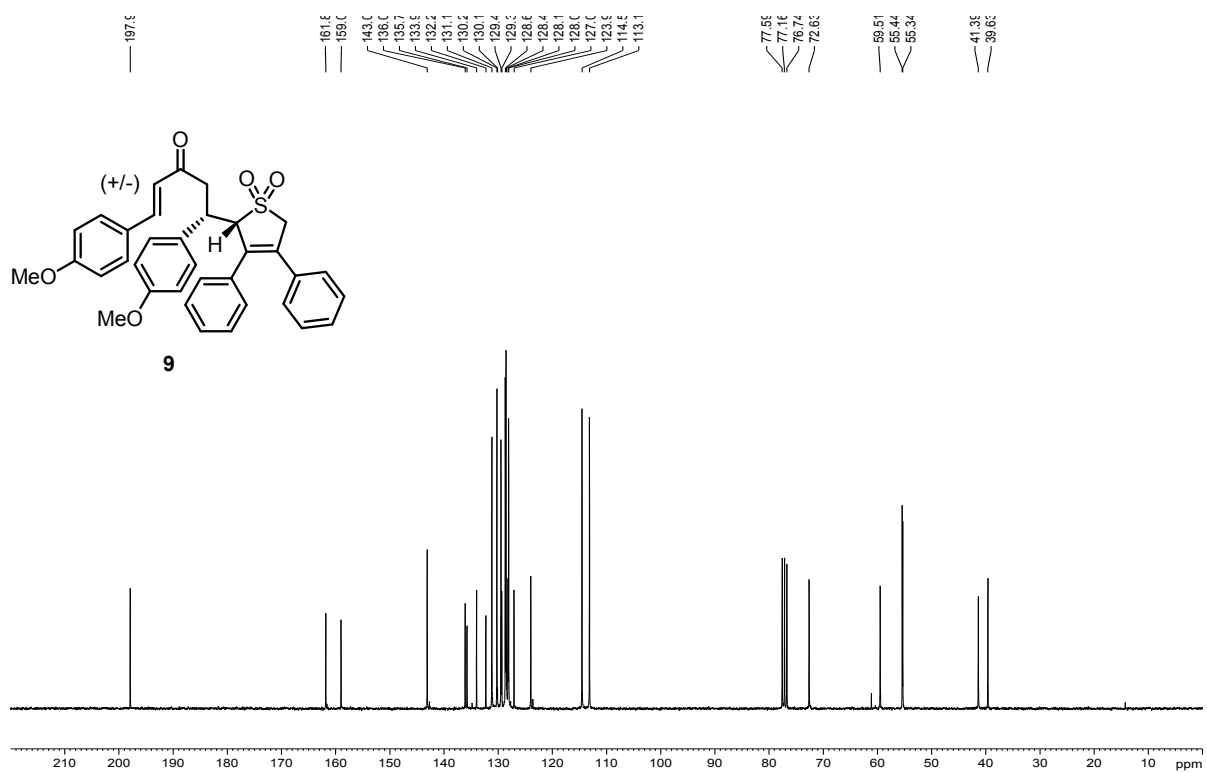

**<sup>1</sup>H NMR spectrum for 10 in CDCl<sub>3</sub>**

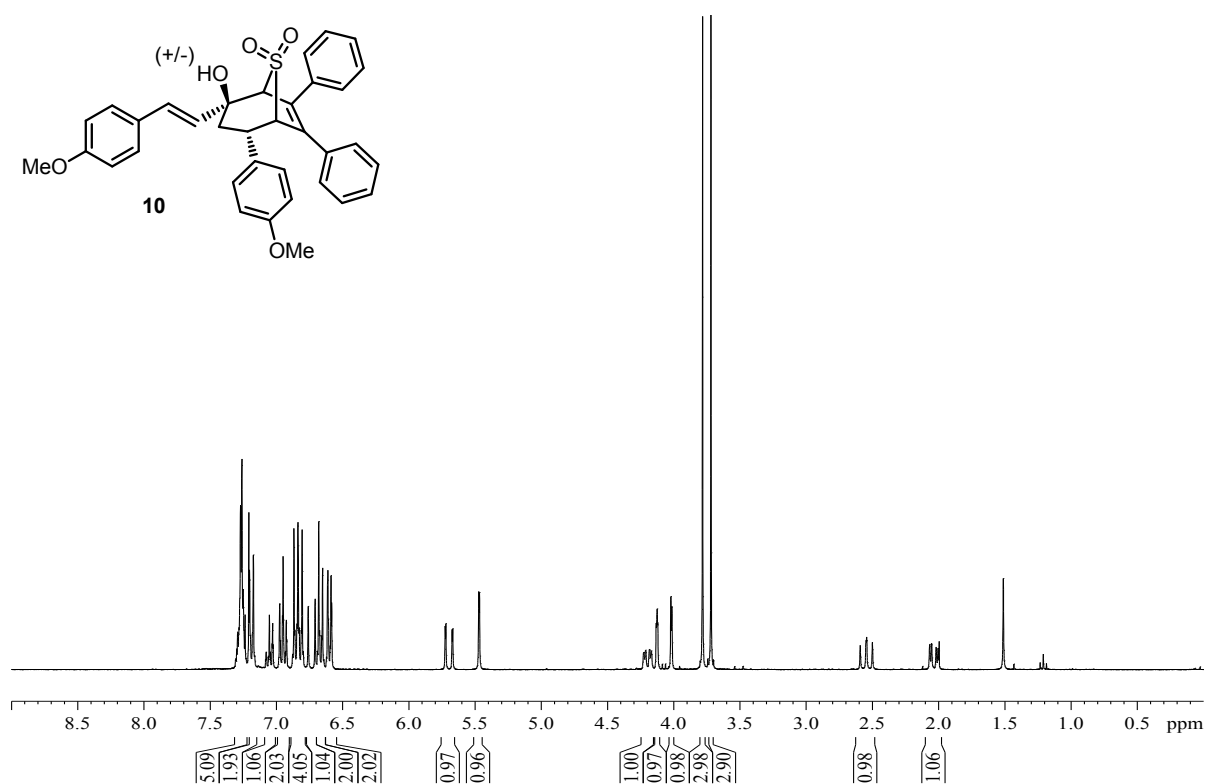

**<sup>13</sup>C NMR spectrum for 10 in CDCl<sub>3</sub>**

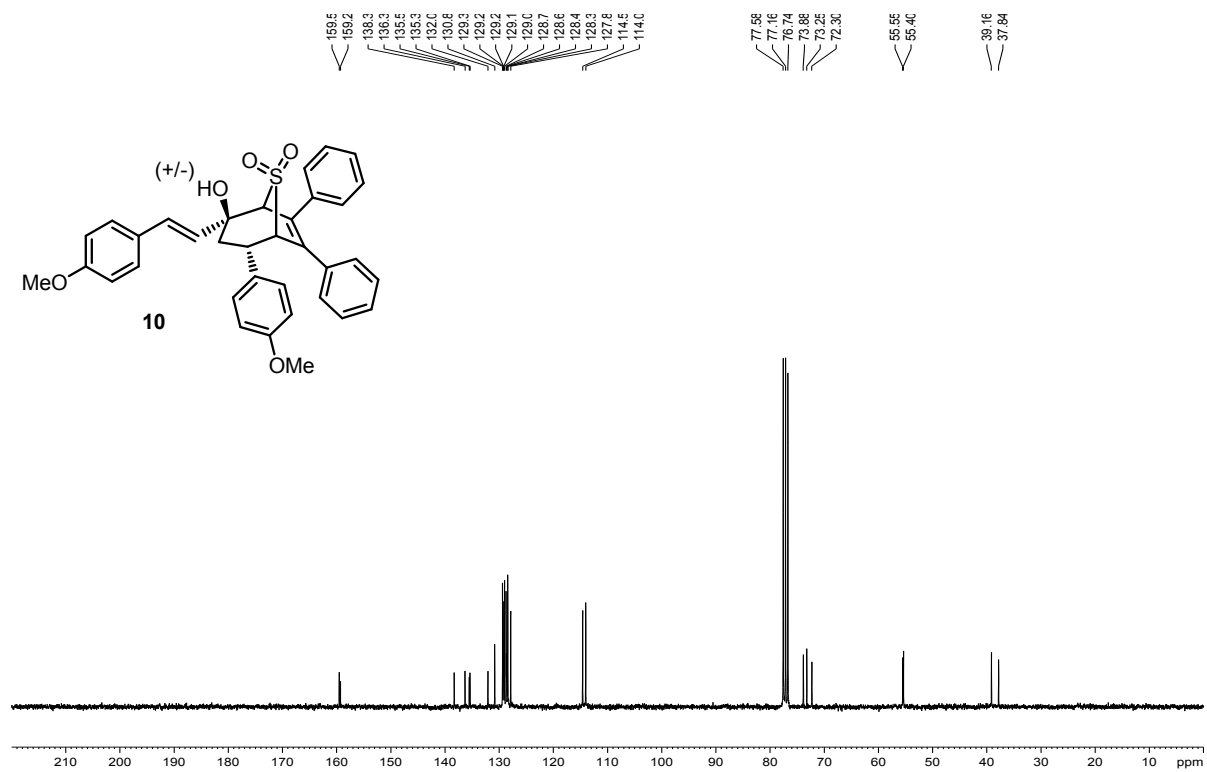



**<sup>1</sup>H NMR spectrum for 12a in CDCl<sub>3</sub>**

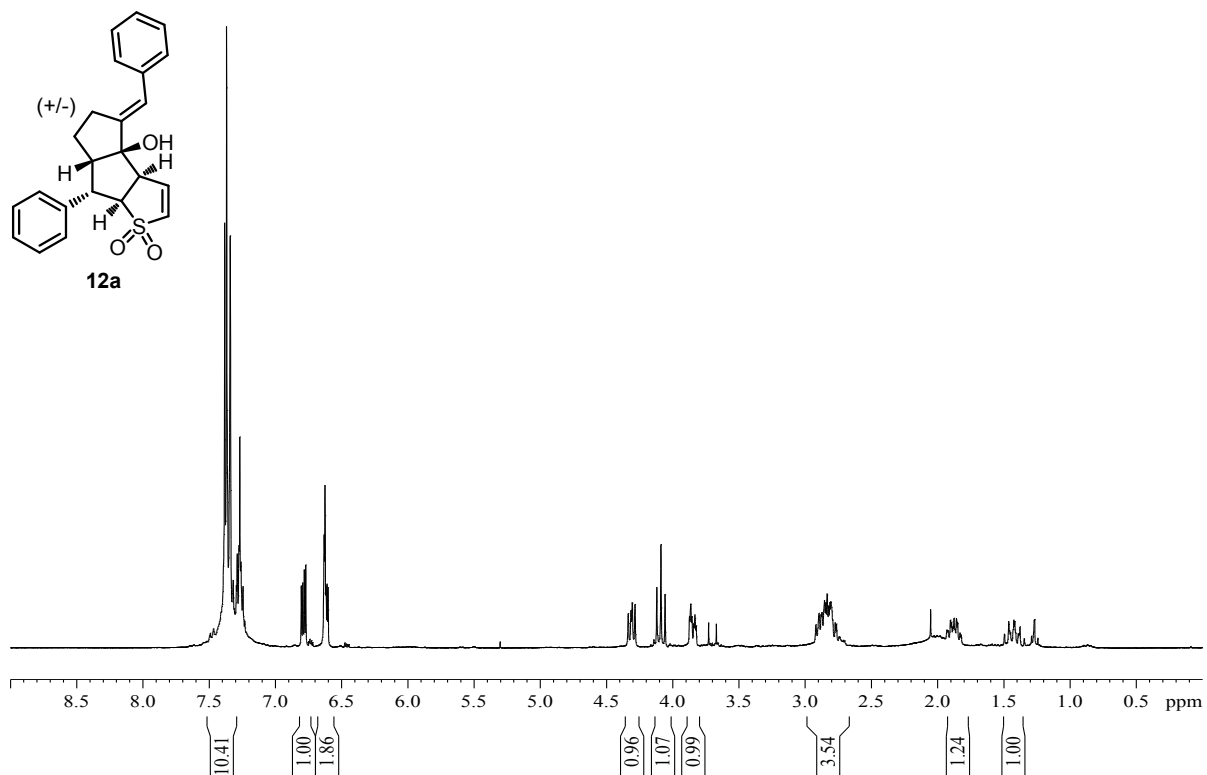

**<sup>13</sup>C NMR spectrum for 12a in CDCl<sub>3</sub>**

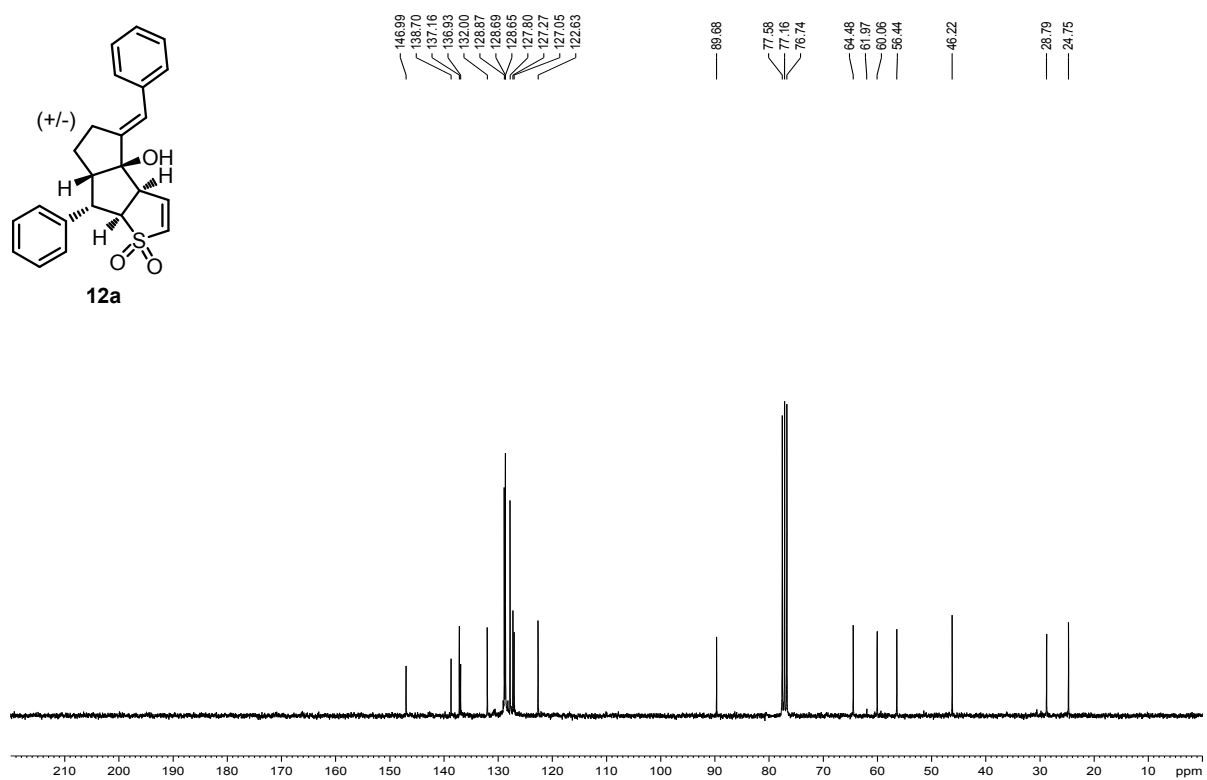

<sup>1</sup>H NMR spectrum for 12b in CDCl<sub>3</sub>

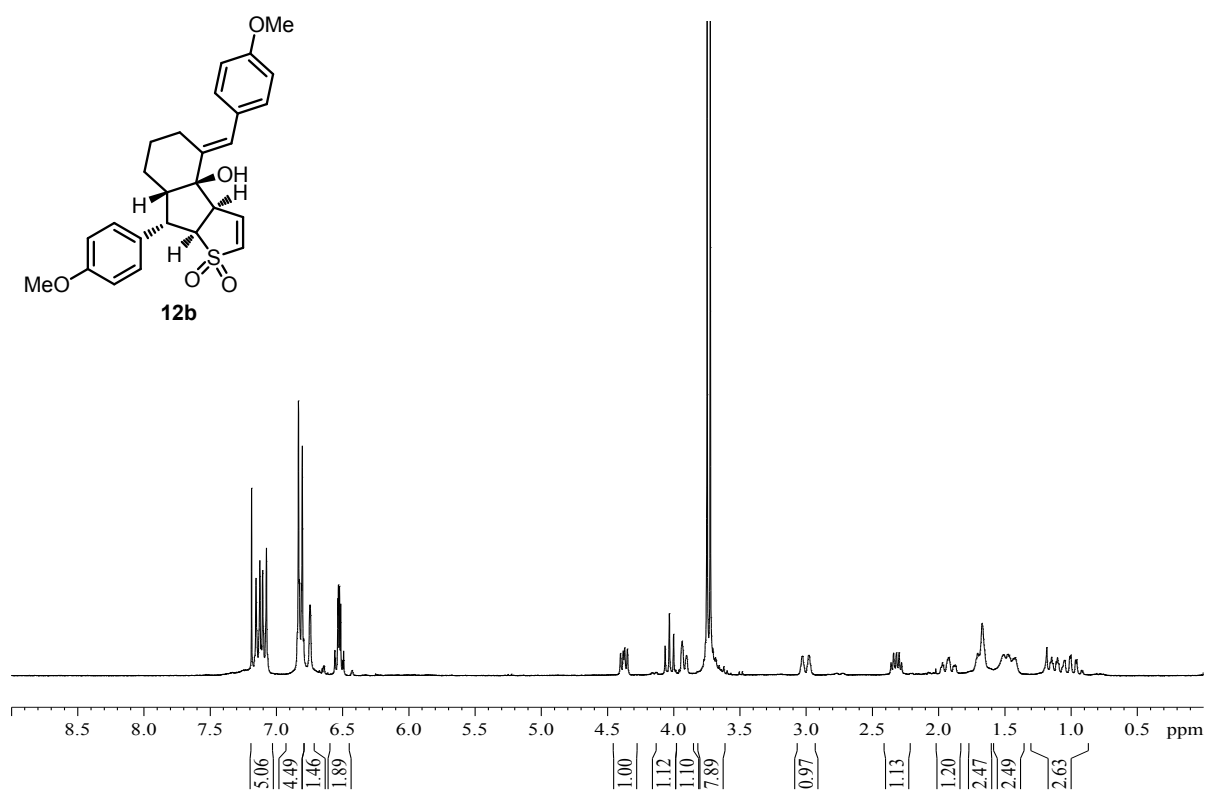

<sup>13</sup>C NMR spectrum for 12b in CDCl<sub>3</sub>

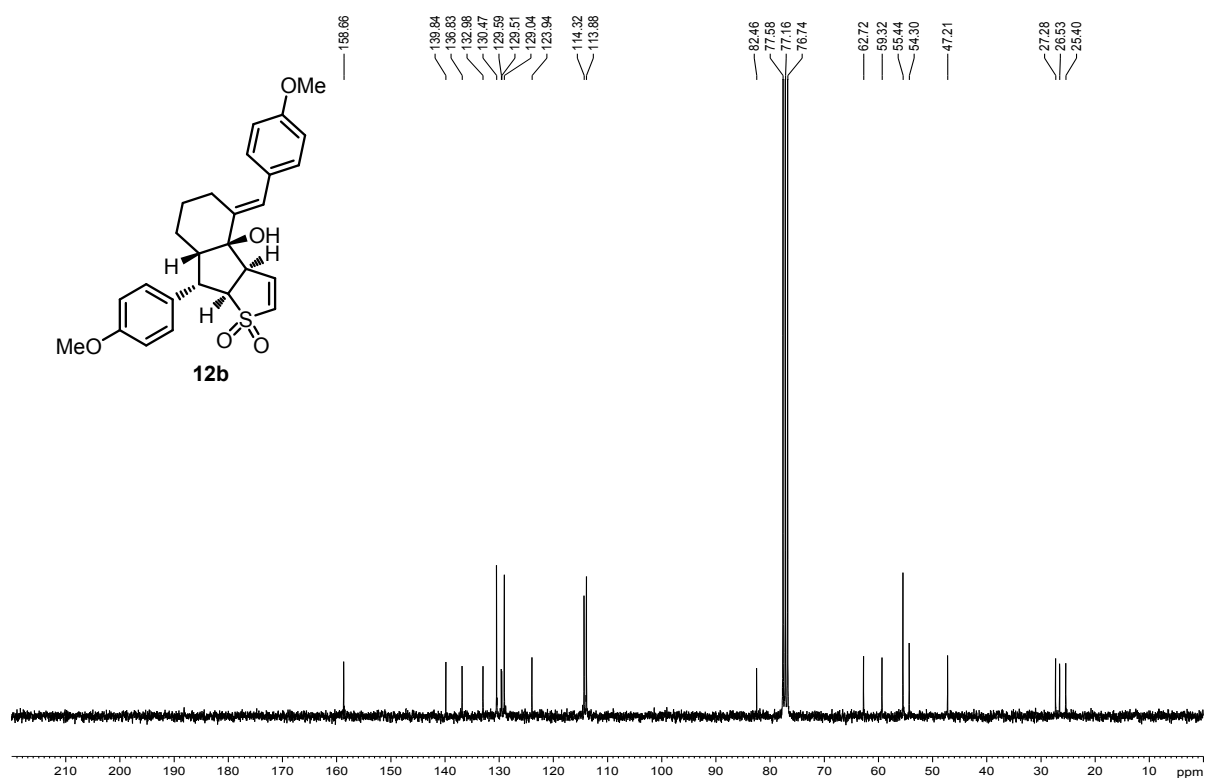

## Collected X-Ray Data

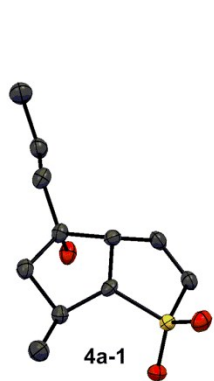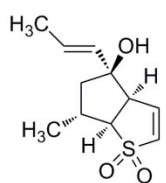

CCDC numbers: 766248

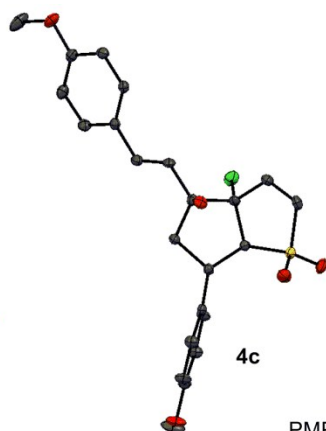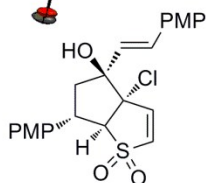

1025137

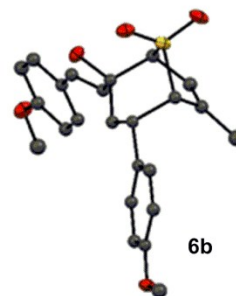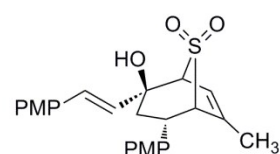

1025139

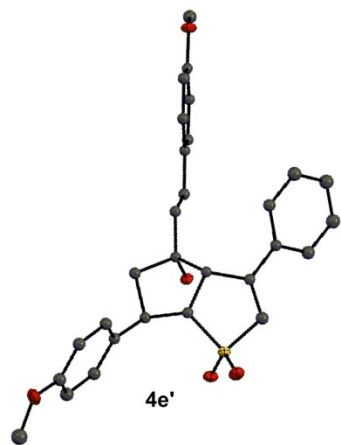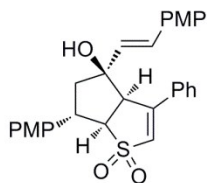

1025138

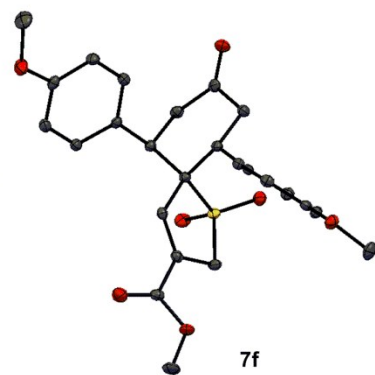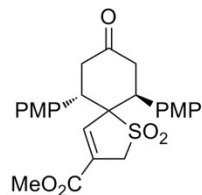

1025140

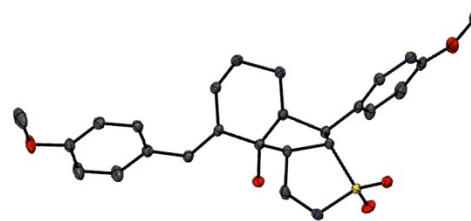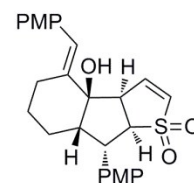

1025141

Expanded X-Ray Structure for 4a-1 (single molecule)

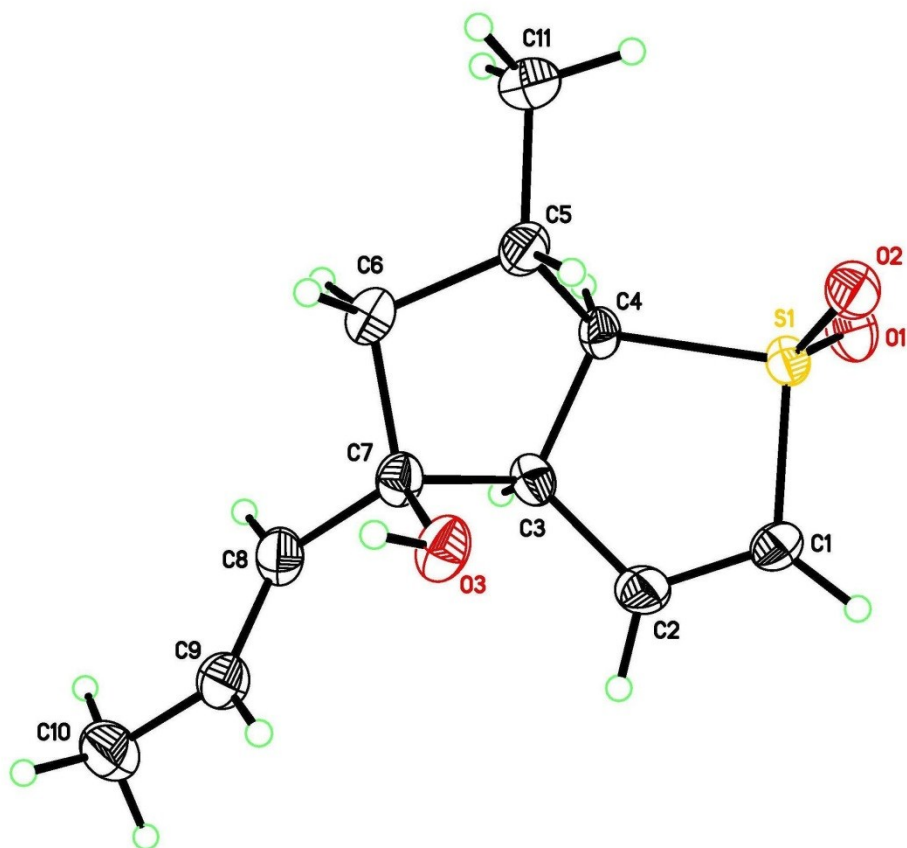

Expanded X-Ray Structure for 4a-1 (hydrogen bond network)

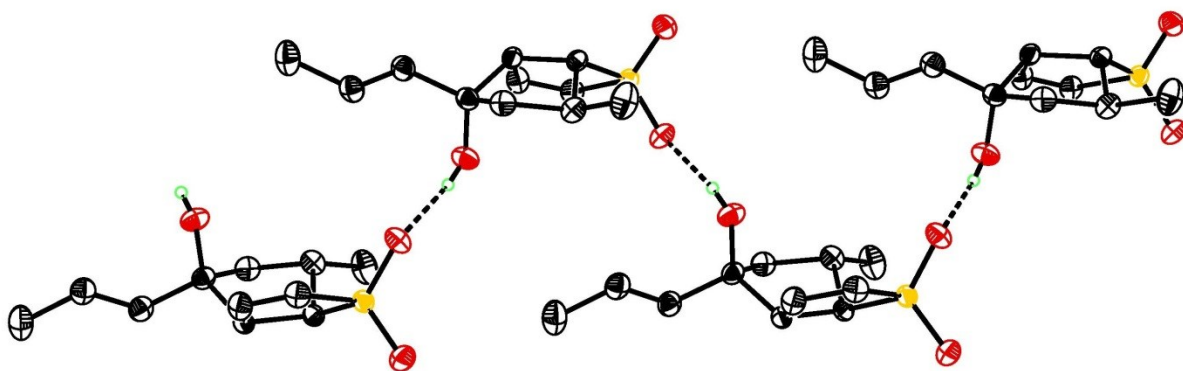

Expanded X-Ray Structure for 4c (major species)

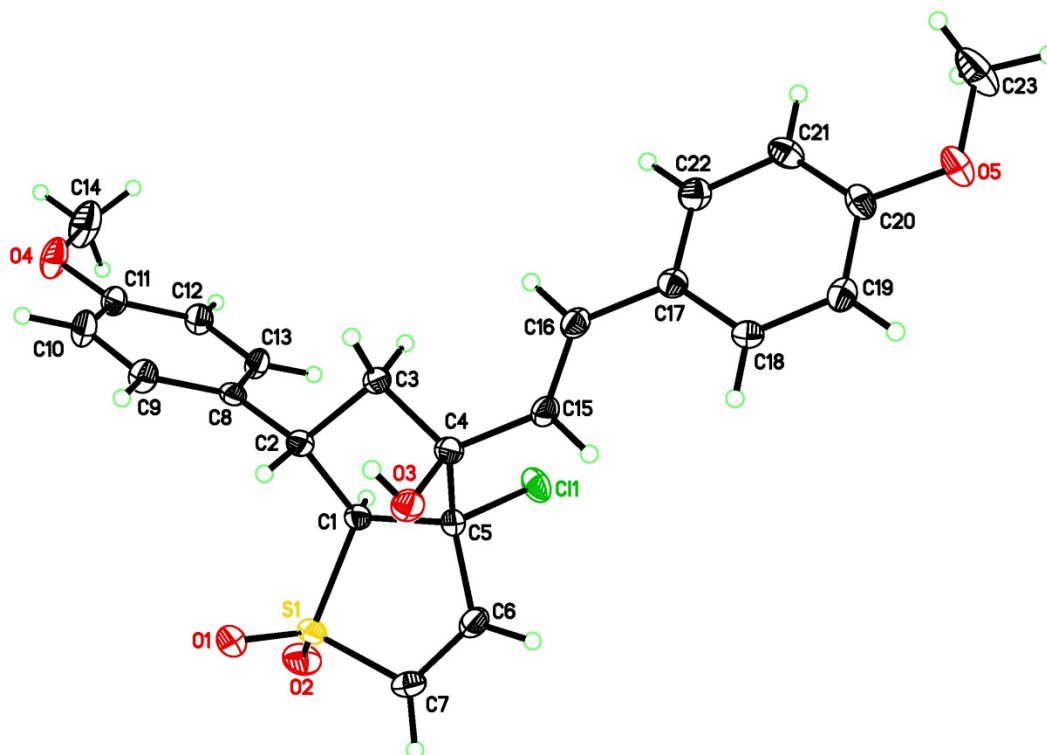

Expanded X-Ray Structure for 4c (full analysis)

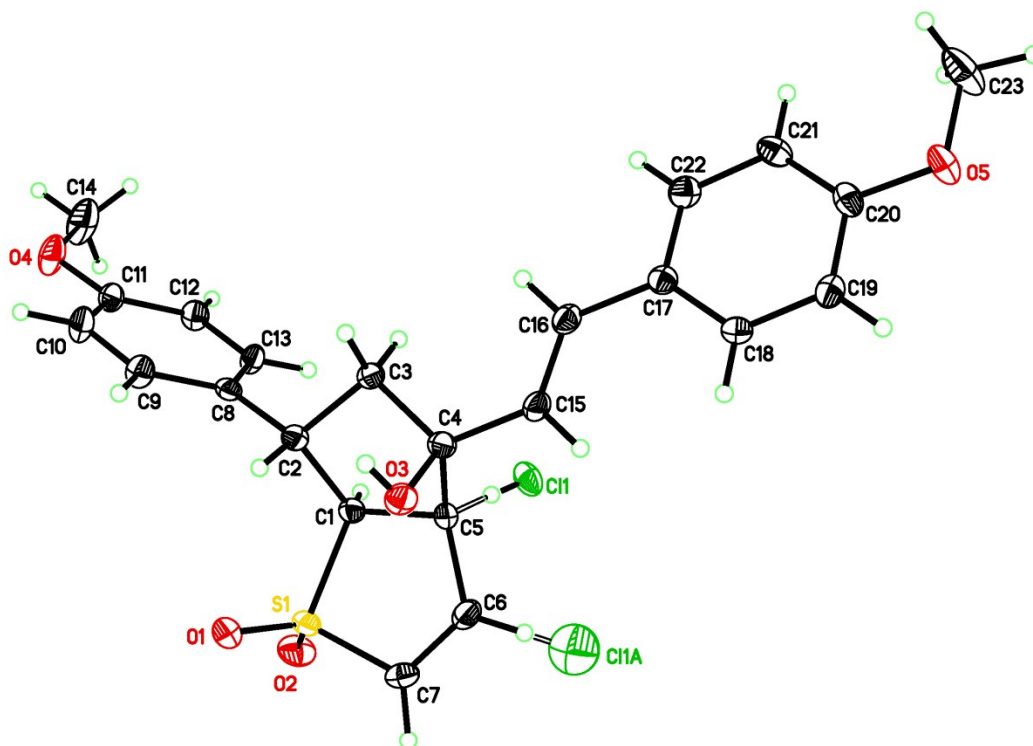

Expanded X-Ray Structure for 4e'

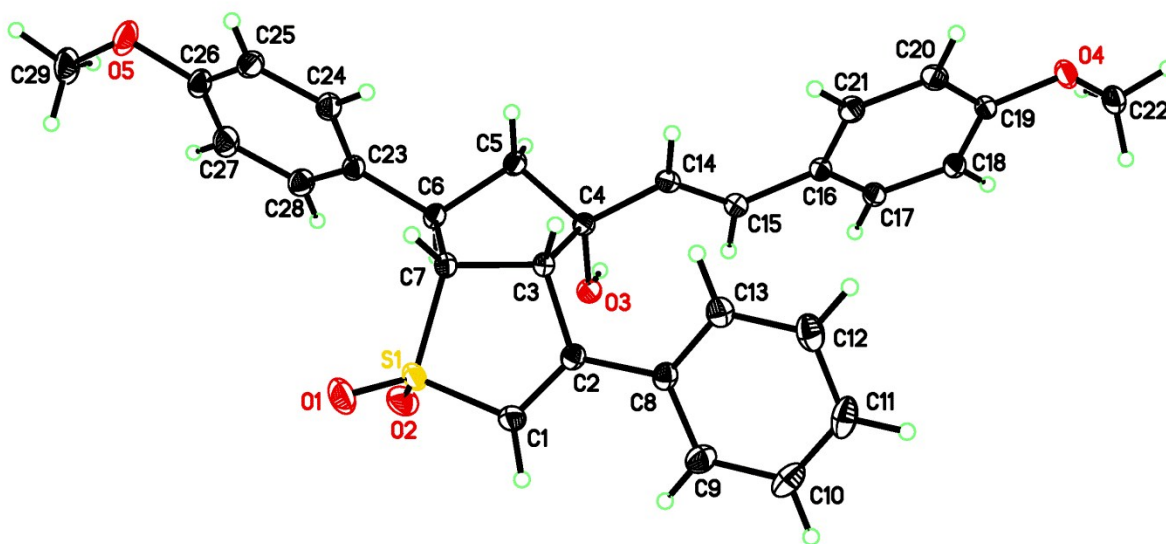

Expanded X-Ray Structure for 6b

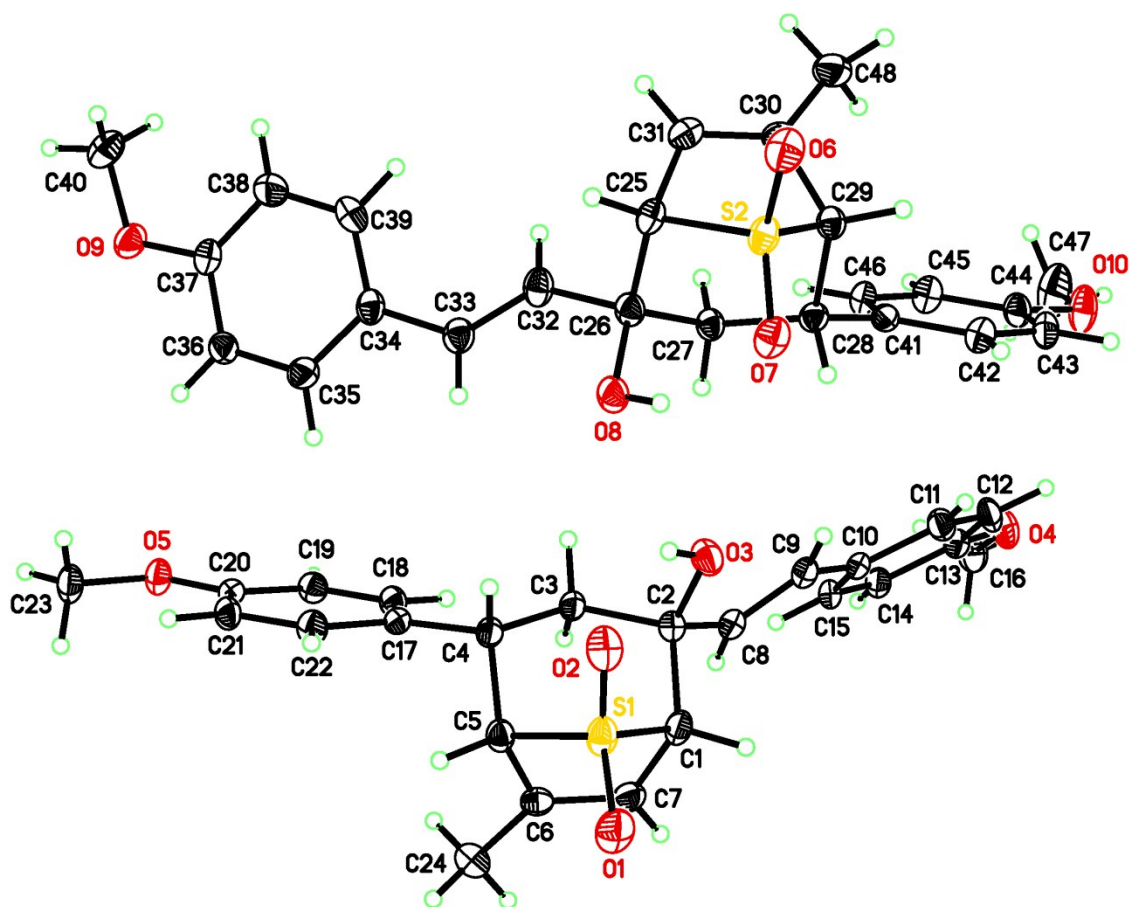

Expanded X-Ray Structure for 7f

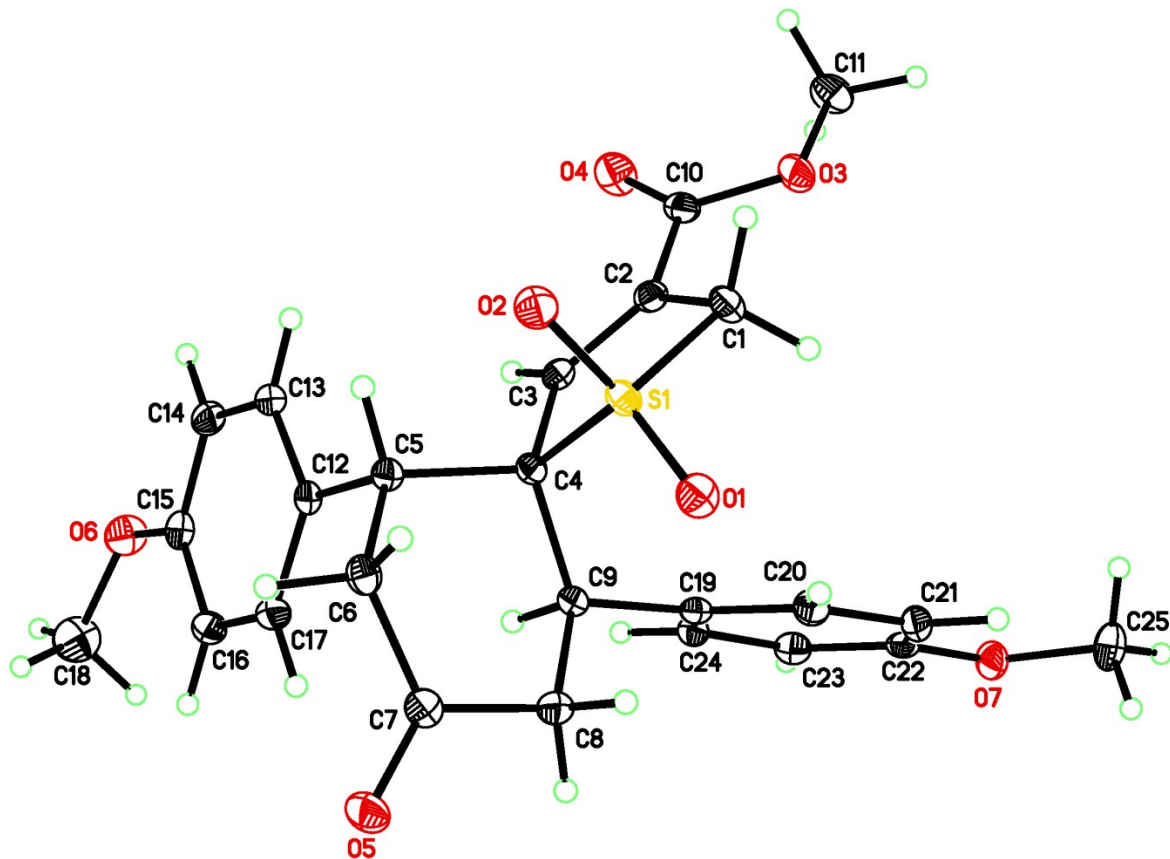

Expanded X-Ray Structure for 12b

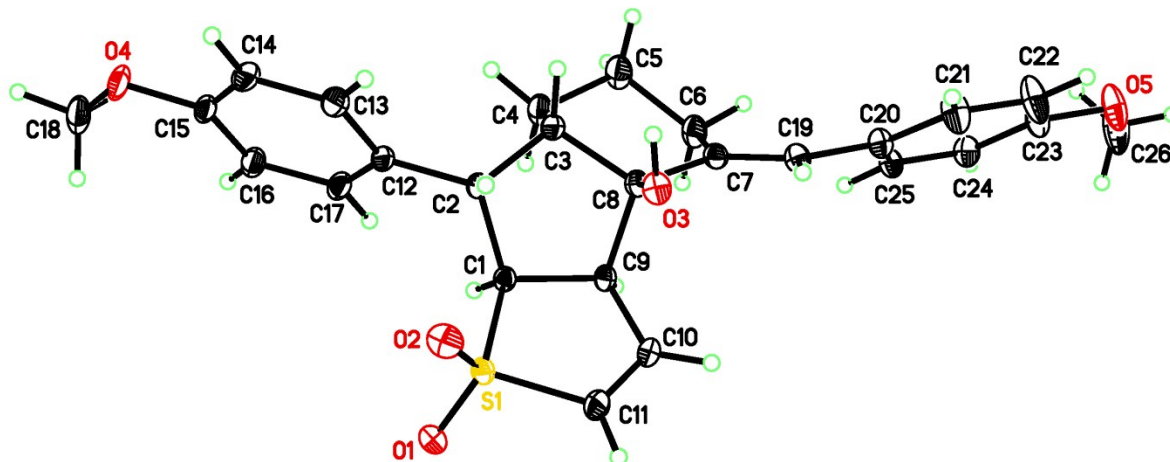

Supplement: c5ob00387c1.pdf [file c5ob00387c1.pdf]
